# Supplementary material for: Online versus paper-based screening for depression and anxiety in adults with cystic fibrosis in Ireland: a cross-sectional exploratory study
Source: PubMed Central journal article supplement — BMJ Open. 2018 Jan 21;8(1):e019305. doi: 10.1136/bmjopen-2017-019305 (PMC5781152; doi:10.1136/bmjopen-2017-019305), 2018-01-21
Supplement: bmjopen-2017-019305.draft_revisions.pdf [file bmjopen-2017-019305.draft_revisions.pdf]

# BMJ Open

BMJ Open is committed to open peer review. As part of this commitment we make the peer review history of every article we publish publicly available.

When an article is published we post the peer reviewers' comments and the authors' responses online. We also post the versions of the paper that were used during peer review. These are the versions that the peer review comments apply to.

The versions of the paper that follow are the versions that were submitted during the peer review process. They are not the versions of record or the final published versions. They should not be cited or distributed as the published version of this manuscript.

BMJ Open is an open access journal and the full, final, typeset and author-corrected version of record of the manuscript is available on our site with no access controls, subscription charges or pay-per-view fees (<http://bmjopen.bmj.com>).

If you have any questions on BMJ Open's open peer review process please email [editorial.bmjopen@bmj.com](mailto:editorial.bmjopen@bmj.com)

# BMJ Open

## Online versus paper-based screening for depression and anxiety in adults with cystic fibrosis in Ireland: a cross-sectional exploratory study

|                                 |                                                                                                                                                                                                                                                                                                                                                                                                                                                                                                                                                                                                                                                                                                                                                                                                                                                                                                                                                                                                                                                                                                                                 |
|---------------------------------|---------------------------------------------------------------------------------------------------------------------------------------------------------------------------------------------------------------------------------------------------------------------------------------------------------------------------------------------------------------------------------------------------------------------------------------------------------------------------------------------------------------------------------------------------------------------------------------------------------------------------------------------------------------------------------------------------------------------------------------------------------------------------------------------------------------------------------------------------------------------------------------------------------------------------------------------------------------------------------------------------------------------------------------------------------------------------------------------------------------------------------|
| Journal:                        | <i>BMJ Open</i>                                                                                                                                                                                                                                                                                                                                                                                                                                                                                                                                                                                                                                                                                                                                                                                                                                                                                                                                                                                                                                                                                                                 |
| Manuscript ID                   | bmjopen-2017-019305                                                                                                                                                                                                                                                                                                                                                                                                                                                                                                                                                                                                                                                                                                                                                                                                                                                                                                                                                                                                                                                                                                             |
| Article Type:                   | Research                                                                                                                                                                                                                                                                                                                                                                                                                                                                                                                                                                                                                                                                                                                                                                                                                                                                                                                                                                                                                                                                                                                        |
| Date Submitted by the Author:   | 01-Sep-2017                                                                                                                                                                                                                                                                                                                                                                                                                                                                                                                                                                                                                                                                                                                                                                                                                                                                                                                                                                                                                                                                                                                     |
| Complete List of Authors:       | Cronly , Jennifer ; University College Cork National University of Ireland, School of Nursing & Midwifery<br>Duff , Alistair ; Leeds Teaching Hospitals NHS Trust, Department of Clinical Psychology<br>Riekert, Kristin A.; John Hopkins University , School of Medicine<br>Perry, Ivan; University College Cork National University of Ireland, School of Epidemiology and Public Health<br>Fitzgerald, Anthony; University College Cork National University of Ireland, School of Epidemiology and Public Health ; University College Cork National University of Ireland, Department of Statistics<br>Horgan, Aine ; University College Cork National University of Ireland, School of Nursing & Midwifery<br>Lehane, Elaine; University College Cork National University of Ireland, School of Nursing & Midwifery<br>Howe, Barbara ; University College Cork National University of Ireland, School of Nursing & Midwifery<br>Ni Chroinin , Muireann ; Cork University Hospital Group, Department of Paediatrics<br>Savage, Eileen; University College Cork National University of Ireland, School of Nursing & Midwifery |
| <b>Primary Subject Heading</b>: | Mental health                                                                                                                                                                                                                                                                                                                                                                                                                                                                                                                                                                                                                                                                                                                                                                                                                                                                                                                                                                                                                                                                                                                   |
| Secondary Subject Heading:      | Respiratory medicine, Health services research, Mental health                                                                                                                                                                                                                                                                                                                                                                                                                                                                                                                                                                                                                                                                                                                                                                                                                                                                                                                                                                                                                                                                   |
| Keywords:                       | Anxiety, Cystic fibrosis < THORACIC MEDICINE, Depression, Online versus paper-based screening, MENTAL HEALTH                                                                                                                                                                                                                                                                                                                                                                                                                                                                                                                                                                                                                                                                                                                                                                                                                                                                                                                                                                                                                    |
|                                 |                                                                                                                                                                                                                                                                                                                                                                                                                                                                                                                                                                                                                                                                                                                                                                                                                                                                                                                                                                                                                                                                                                                                 |

SCHOLARONE™  
Manuscripts

## TITLE PAGE

**Online versus paper-based screening for depression and anxiety in adults with cystic fibrosis in Ireland: a cross-sectional exploratory study****Corresponding Author:**

Eileen Savage  
School of Nursing & Midwifery,  
Brookfield Health Sciences Complex,  
University College Cork  
Cork,  
Ireland.

Email: [e.savage@ucc.ie](mailto:e.savage@ucc.ie)

Tel: 353 (0)21 4901554

Fax: 353 (0)21 4901493

Note: corresponding author names last below.

**Co-Authors (& Corresponding author named last)**

Cronly, Jennifer,<sup>1</sup> Duff, Alistair J.,<sup>2</sup> Riekert, Kristin A,<sup>3</sup> Perry, Ivan J.,<sup>4</sup> Fitzgerald, Anthony P.,<sup>4,5</sup> Horgan, Aine,<sup>1</sup> Lehane, Elaine,<sup>1</sup> Howe, Barbara,<sup>1</sup> Ni Chroinin, Muireann,<sup>6</sup> Savage, E.<sup>1</sup>

<sup>1</sup>School of Nursing & Midwifery, Brookfield Health Sciences Complex, University College Cork, Cork, Ireland

<sup>2</sup>Department of Clinical Psychology, Leeds Teaching Hospitals NHS Trust, Leeds, UK.

<sup>3</sup>School of Medicine, John Hopkins University, Baltimore, Maryland, USA.

<sup>4</sup>School of Epidemiology and Public Health, Western Gateway Building, University College Cork, Cork, Ireland

<sup>5</sup>Department of Statistics, Western Gateway Building, University College Cork, Cork, Ireland

<sup>6</sup> Department of Paediatrics, Cork University Hospital, Wilton, Cork, Ireland.

**Keywords:** Anxiety, Cystic fibrosis, Depression, Mental health, Online versus paper-based screening.

Word count: 4208 (excluding title page, abstract, references, figures and tables).

## ABSTRACT

**Objective:** To compare online and paper-based screening for depression and anxiety in adults with cystic fibrosis (CF).

**Design and Setting:** Cross-sectional study in CF clinics in Ireland and through the Cystic Fibrosis Ireland online community.

**Participants:** 160 adult patients aged 18 or above were recruited. Of these, 147 were included in the analysis; 83 online and 64 paper-based. The remaining 13 were excluded because of incomplete data.

**Measures:** Depression and anxiety were measured using the Hospital Anxiety and Depression Scale (HADS). Data on pulmonary function (FEV%) and BMI were self-reported based on clinic assessments. Socio-demographic data were collected.

**Results:** Compared to the paper-based participants, the online participants were more likely to be female (61.7% vs 48.4%), older (mean 32.2 vs 28.2 years) and were more likely to be married (32.5% vs 15.6%), living with their spouse or partner (42.5% vs 22.6%), and working either full time (33.7% vs 15.9%) or part-time (30.1% vs 17.5%). The prevalence rates of elevated anxiety and depression were not significantly different ( $p=0.71$  &  $p=0.56$ ). HADS anxiety and depression scores were not statistically different between online ( $p=0.83$ ) and paper-based ( $p=0.92$ ) participants based on Mann-Whitney U test. A significant negative correlation was found between depression and pulmonary function ( $r=-0.39$ ,  $p=0.01$ ) and anxiety and pulmonary function ( $r=-0.36$ ,  $p=0.02$ ). Based on Cronbach's alpha, there were no statistically significant differences between the online and paper-based participants on the internal consistency of the HADS anxiety ( $p=0.073$ ) and depression ( $p=0.378$ ) scales.

**Conclusions:** Our findings suggest that online and paper-based screening for depression and anxiety in adult patients with CF yield comparable findings on prevalence rates and scores, associations with health, and internal consistency of subscales. This study highlights that online screening offers an alternative method to paper-based screening. Further research with a larger sample is needed to confirm our results.

## Strengths and Limitations of this Study

- This is the first study to explore online compared to paper-based screening of depression and anxiety in an adult population of patients with CF.
- Given the recent publication on international guidelines for depression and anxiety screening in the CF population, our study is timely because it draws attention to online screening as an alternative method to paper-based screening.
- The small sample size and self-selection bias in this study are threats to its internal and external validity.
- Assessment of psychometric properties of the HADS was limited to internal consistency and further research is needed on the full scope of reliability and validity of scales used to assess depression and anxiety in the CF population, noting that the recent international guidelines support the use of the PHQ-9 for depression and GAD-7 for anxiety.

## INTRODUCTION

Cystic fibrosis (CF) is chronic, progressive and life-shortening, although increased survival rates into middle adulthood are now expected because of treatment and management advances.<sup>1</sup> The disease is characterised in part by increased susceptibility to recurrent chest infections due to excessive

1  
2  
3 production of mucous in the small respiratory airways. In addition, obstruction of pancreatic enzyme  
4 secretion due to increased mucous production in the gastrointestinal tract results in poor growth  
5 and weight loss.<sup>2</sup>

6 To date, most research efforts has focussed on understanding the pathophysiology of CF and the  
7 most promising treatment strategies.<sup>3</sup> However, in recent years there has been a growing body of  
8 research on the psychological health of individuals with CF, particularly on the prevalence of  
9 depression and anxiety, and their associations with physical health. The International  
10 Depression/Anxiety Study (TIDES) is a landmark collaboration across several European countries and  
11 the USA which screened for depression and anxiety in the CF adult and adolescent populations, and  
12 parent caregivers.<sup>4-9</sup> In adults with CF, elevated depression and anxiety scores were associated with  
13 poorer lung function and quality of life.<sup>4,5</sup> One of the main conclusions of TIDES was to recommend  
14 annual screening of patients with CF for symptoms of depression and anxiety, so that those affected  
15 receive timely further assessment and treatment<sup>4</sup>. This was endorsed by the European Cystic  
16 Fibrosis Society's (ECFS) *Standards of Care* published in 2014.<sup>10</sup> In 2016, guidelines for screening and  
17 treating depression and anxiety from the International Committee on Mental Health in Cystic  
18 Fibrosis (ICMH-CF) were published recommending that annual screening be conducted by health  
19 care professionals, preferably mental health specialists.<sup>11</sup>

20 Studies on screening for depression and anxiety in patients with CF and their parent caregivers  
21 have collected data during clinic visits with high response rates.<sup>5,7,12-15</sup> However, high response rates  
22 seen in research may not be feasible within the context of routine clinic visits or annual review  
23 assessments. CF teams may face significant challenges in implementing screening for depression and  
24 anxiety. In a large scale study on CF mental health delivery,<sup>16</sup> limited staff time and limited  
25 personnel were ranked as the two highest barriers to implementing a mental health screening  
26 programme. Access to electronic tools for screening administration and scoring was ranked by 40%  
27 of respondents as among the top three areas that would be helpful in implementing mental health  
28 screening.<sup>16</sup> Yet, to date, little consideration has been given to the possibility of online screening of  
29 patients with CF for depression and anxiety.

30 Computerised screening for depression has been available since the 1990s,<sup>17</sup> with the potential  
31 for internet-based screening of large populations.<sup>18</sup> Online screening for depression and/or anxiety  
32 has been used in clinical populations such as lung and breast cancer patients,<sup>19</sup> and women with  
33 postpartum depression.<sup>20</sup> Advantages of online screening include reduced costs,<sup>20</sup> an ability to  
34 assess large populations,<sup>18,21</sup> feasibility and acceptability for patients to use,<sup>20</sup> and a practical  
35 approach to screening for clinical teams.<sup>22</sup> Reported disadvantages of online screening are the  
36 possibility that older adults may be less likely to participate,<sup>18</sup> the need for computer literacy,<sup>23</sup> and  
37 that response or retention rates may be low.<sup>21</sup>

38 There has been no research to date comparing the results of online and paper-based assessment  
39 of mental health among patients with CF. Comparisons have been made in patients with tinnitus<sup>24</sup>  
40 using the Hospital Anxiety and Depression Scale (HADS). Compared to the clinic paper-based sample,  
41 the online sample had higher prevalence rates of depression (17% vs 15%) and anxiety (25% vs 15%)  
42 and had significantly higher scores for both which the researchers speculated may have been due to  
43 anonymised self-recruitment offering an internet intervention on psychological support. Other  
44 researchers compared psychometric properties between online and paper versions of depression  
45 instruments administered to primary care and psychiatric care patients.<sup>22</sup> The findings indicated  
46 equivalence and no clinically relevant differences between method of administration with high  
47 correlations found between both scores. It is not possible to draw conclusions from existing research  
48 for the CF population because of the different clinical populations.

1  
2  
3 The aim of this study was to compare online versus clinic paper-based assessment of depression  
4 and anxiety in a CF adult population in Ireland in relation to sample characteristics, prevalence data,  
5 and associations with physical health (pulmonary function and BMI). In addition, the study aimed to  
6 compare online and paper versions for internal consistency of the depression and anxiety measure,  
7 which for this study was the HADS.  
8  
9

## 10 **METHODS**

### 11 **Study design and setting**

12 We conducted this exploratory study as part of a larger cross-sectional study in Ireland on the  
13 national prevalence of depression and anxiety in the CF population and associations with physical  
14 health and quality of life. The larger study included adolescents, their caregivers and adult patients.  
15 This paper reports on the adult data. We aimed to collect data from adults in all six adult CF centres  
16 in Ireland. At the outset, we intended to collect data during scheduled clinic visits similar to the  
17 studies involved in TIDES,<sup>4</sup> and ethical approval was obtained for this. However, due to problems  
18 with recruitment (described below), data were also collected online.  
19  
20  
21

### 22 **Participants and recruitment**

23 The study aimed to recruit adults with CF aged 18 years or over. The only exclusion criteria were  
24 adults who had received lung or heart-lung transplantation. Data available from the CF Registry of  
25 Ireland at the outset of the study indicated that the total adult population with CF aged 18 years and  
26 over was 595.<sup>25</sup> In order to estimate the true proportion of depression and anxiety within a  
27 confidence interval of +/- 3% for this population size, it was calculated that we needed to recruit 382  
28 adults.  
29

30 Our initial plan was to recruit adults during scheduled clinic visits at the CF centres. We sought  
31 access to the study sample through the CF teams by writing to the Consultant Respiriologists  
32 informing them about the study. We offered to meet the CF teams to discuss the study further, and  
33 a meeting was held in three of the six centres.  
34

35 For three of the CF centres, access was generally unproblematic and was supported by the CF  
36 healthcare team. Access was not achieved in one centre because of no response to our efforts to  
37 contact the relevant respiratory consultants. In two centres, staffing resource constraints made data  
38 collection at clinics impossible. Research access to clinical sites can be challenging and is reliant on  
39 key gatekeepers in the services.<sup>26,27</sup> Even in the remaining three clinics where we did have access,  
40 data collection was slow because of time constraints for adults in completing questionnaires or busy  
41 workloads of clinic staff making it difficult to administer questionnaires during clinic appointments.  
42 In view of the challenges faced in collecting data, we reapplied for ethical approval to recruit adults  
43 online through the Cystic Fibrosis Ireland community network.  
44  
45

### 46 **Data Collection Procedures**

47 Data collection occurred between July 2014 and July 2015. At clinics, patients were approached by a  
48 member of the CF multidisciplinary team. After obtaining informed consent, patients were given the  
49 questionnaire pack which could be completed on site or at home and returned to the research team  
50 by stamped addressed envelope. Data collection was slow such that over a period of twelve months,  
51 paper-based data collection was completed for just 64 adults across three CF centres. Of these, 39  
52 completed the questionnaire on site during a clinic visit, and 25 completed the questionnaire at  
53 home. The questionnaire took approximately 15-20 minutes to complete. The response rates in the  
54 three centres were 53%, 52% and 29%. The overall response rate for the clinic sample was 51%.  
55  
56  
57  
58  
59  
60

1  
2  
3 Patients were not specifically asked for reasons for non-participation but some volunteered that  
4 they were 'not interested' or already involved in other research projects.

5 The online version of the questionnaire was developed and administered using the online survey  
6 development software, Survey Monkey. The link to the questionnaire, information sheet and  
7 consent form was emailed by the administrator of the Cystic Fibrosis Ireland (CFI) community  
8 network to 345 adults with CF with one follow-up reminder after 7 days. After a period of two  
9 weeks, 99 responses were collected which was a response rate of 29%; reasons for non-participation  
10 could not be gleaned. The invitation email clearly instructed that if the questionnaire was already  
11 completed during a clinic visit, there was no need to complete the online survey. We cross-checked  
12 all returned online questionnaires with paper-based questionnaires for duplication and removed 3  
13 duplicates.  
14

15 In total, 160 adult patients aged 18 or over were recruited from CF clinics or online. Of these, 147  
16 were included in the analysis of whom 83 were the online sample and 64 were the paper-based  
17 sample. The remaining 13 respondents were excluded because of incomplete data. With 595 adults  
18 entered in the CF Registry of Ireland,<sup>25</sup> the sample size of 147 represented 27.6% of the adult CF  
19 population in Ireland.  
20

## 21 22 **Measures**

23 Study packs contained: an information leaflet and consent form; a background information  
24 questionnaire; and the HADS.<sup>28</sup> The background information questionnaire gathered socio-  
25 demographic data such as age, gender, marital status, living arrangements, and educational and  
26 employment information as well as a section on physical and mental health information. In this  
27 section, participants were asked to provide self-reported data, based on their most recent clinic visit,  
28 on their pulmonary function (FEV%), and height (cm) and weight (kg) which were used to calculate  
29 Body Mass Index.  
30

31 The HADS is a brief 14-item instrument used for screening depression (7 items) and anxiety  
32 symptoms (7 items). Each item requires the participant to select one statement from four options on  
33 a Likert scale. Scores range from a minimum of 0 to a maximum of 21 for both anxiety and  
34 depression. The HADS has well established clinical cut-off scores with a score higher than 7  
35 indicating elevated symptoms of anxiety or depression and a score higher than 10 indicating anxiety  
36 or depression in the clinically significant range. The HADS has good psychometric properties as  
37 indicated by analysis of internal consistency, discriminant validity and factor structure.<sup>29</sup> It was also  
38 the instrument used in TIDES to assess anxiety and depression symptoms in CF patients.<sup>4</sup> A referral  
39 process for follow-up psychological support was in place for participants with elevated depression  
40 and anxiety scores.  
41  
42

## 43 **Statistical analysis**

44 Data were analysed using SPSS version 22.0 for Windows. To determine if there were statistically  
45 significant differences between the online and paper-based samples on demographic variables,  
46 independent samples t-tests and chi-square tests were run. In cases where 80% of expected cell  
47 count were not greater than five, or all expected cell counts were not greater than one, Fischer's  
48 Exact Test was used. As the HADS data did not meet requirements of the normal distribution, the  
49 median and interquartile range are reported, and the Mann-Whitney U test was run to compare the  
50 online and paper-based samples. Prevalence of elevated and clinically significant anxiety and  
51 depression in online and paper-based samples were compared using Chi-square tests. The mean and  
52 standard deviation of physical health outcome variables, pulmonary function and BMI, are reported  
53 and the online and paper-based samples were compared using independent samples t-tests. To  
54 examine the relationship between HADS scores and physical outcome variables, Spearman's  
55  
56  
57  
58  
59  
60

correlational coefficients were calculated. Cronbach's alpha was used to examine the internal consistency of the HADS anxiety and depression scales for both the online and paper-based samples, and Fishers Bonett test was used to examine statistically significant differences in Cronbach's alpha between the two samples. Missing data were excluded from the analysis.

## RESULTS

### Demographic characteristics of online and clinic samples

A total of 147 adults with CF participated in the study. Of these, 56.5% (n=83) completed online and 43.5% (n=64) completed paper-based questionnaires. The demographic characteristics of the online and paper-based samples are presented in Table 1. Compared to the paper-based sample, the online sample was more likely to be female (61.7% vs 48.4%), older (mean=32.2, SD=7.3 vs mean=28.2, SD=10.6), and more likely to be married (32.5% vs 15.6%), living with their spouse or partner (42.5% vs 22.6%), and working full time (33.7% vs 15.9%) or part time (30.1% vs 17.5%). There were no clear differences between the two groups for level of education.

**Table 1 Characteristics of adults with CF by method of data collection (N=147)**

|                                     | Online Sample<br>(n=83) | Paper-based<br>Sample<br>(n=64) | P Value*     |
|-------------------------------------|-------------------------|---------------------------------|--------------|
| Age in years – Mean (SD)            | 32.2 (7.3)              | 28.2 (10.6)                     | <b>0.008</b> |
| Gender – n (%)                      |                         |                                 | 0.131        |
| Males                               | 31 (38.3)               | 33 (51.6)                       |              |
| Females                             | 50 (61.7)               | 31 (48.4)                       |              |
| Marital status – n (%)              |                         |                                 | <b>0.044</b> |
| Single                              | 37 (44.6)               | 42 (65.6)                       |              |
| Married                             | 27 (32.5)               | 10 (15.6)                       |              |
| ...With partners                    | 18 (21.7)               | 11 (17.2)                       |              |
| ...Separated                        | 1 (1.2)                 | 1 (1.6)                         |              |
| General Living Arrangements         |                         |                                 | <b>0.024</b> |
| ...With parents                     | 28 (35.0)               | 37 (59.7)                       |              |
| ...With partner/spouse              | 34 (42.5)               | 14 (22.6)                       |              |
| ...With housemates                  | 8 (10)                  | 7 (11.3)                        |              |
| ...Alone                            | 10 (12.5)               | 4 (6.5)                         |              |
| Highest Level of Education – n (%)  |                         |                                 | 0.318        |
| Masters/PhD                         | 14 (17.2)               | 7 (11.3)                        |              |
| Postgraduate Cert/Diploma           | 8 (9.9)                 | 3 (4.8)                         |              |
| Bachelor's Degree                   | 18 (22.2)               | 19 (30.6)                       |              |
| Technical Cert/Diploma              | 20 (24.7)               | 9 (14.5)                        |              |
| Leaving Certificate                 | 14 (17.3)               | 16 (25.8)                       |              |
| Junior Certificate                  | 7 (8.6)                 | 7 (11.3)                        |              |
| Primary School                      | 0 (0.0%)                | 1 (1.6%)                        |              |
| Employment Status – n (%)           |                         |                                 | <b>0.005</b> |
| Working Full-time                   | 28 (33.7)               | 10 (15.9)                       |              |
| Working Part-time                   | 25 (30.1)               | 11 (17.5)                       |              |
| Unable to Work due to Illness       | 14 (16.9)               | 14 (22.2)                       |              |
| Unemployed/ Seeking Work            | 9 (10.8)                | 16 (25.4)                       |              |
| Other (Studying/Retired/Home-maker) | 7 (8.4)                 | 12 (19)                         |              |

\***Bold text represents significant p values.**



### Internal Consistency of the HADS Scale in Online and Paper-based Samples

The internal consistency of both online and paper-based HADS measure were similar. For the anxiety subscale, the Cronbach's alpha level was 0.84 for the online sample, and 0.89 for the paper-based sample. For the depression subscale, the alpha level was 0.87 for the online sample, and 0.88 for the paper-based sample. There were no statistically significant differences between the online and paper-based samples on Cronbach's alpha for the anxiety subscale ( $p=0.073$ ) or depression subscale ( $p=0.378$ ).

### Prevalence of anxiety and depression

In the online sample, 25% ( $n=20$ ) had HADS scores greater than 7 indicating elevated anxiety, and 11.3% ( $n=9$ ) had anxiety scores in the clinically significant range with scores higher than 10. In the paper-based sample, 28.1% ( $n=18$ ) had elevated anxiety scores, and 14% ( $n=9$ ) of the sample had anxiety scores in the clinically significant range. For depression, 7.5% ( $n=6$ ) of the online sample had elevated scores higher than seven and 3.8% ( $n=3$ ) of the sample scored within the clinically significant range higher than 10. In the paper-based sample, 10.9% ( $n=7$ ) had elevated depression scores and 4.7% ( $n=3$ ) had depression scores in the clinically significant range. There were no statistically significant differences between the online and paper-based samples with elevated anxiety ( $p=0.71$ , 95% CI -0.12 to 0.19) or depression ( $p=0.56$ , 95% CI=-0.07 to 0.15) scores or between those with clinically significant anxiety ( $p=0.61$ , 95% CI -0.0 to -0.16) or depression ( $p=0.78$ , 95% CI -0.07 to 0.11) scores.

### HADS scores and physical health outcome variables

We compared the online and paper-based samples on their HADS scores and physical health outcome variables. As illustrated in Table 2, there were no significant differences between the online and paper-based samples on their HADS anxiety ( $p=0.83$ ) or depression scores ( $p=0.92$ ). The median scores for both online and paper-based samples were 5.00 for anxiety and 1.00 for depression, where the minimum possible HADS score is 0 and the maximum score is 21. Similarly, there were no significant differences between the two groups on pulmonary function ( $p=0.39$ ) with a mean FEV% of 67.23 for the online sample and 63.02 for the paper-based sample. There were no significant differences between the two groups on BMI values ( $p=0.60$ ) with means of 22.01 for the online and 21.74 for the paper-based sample.

**Table 2 Physical and mental health variables by method of data collection (N=147)**

|                                                                | Online Sample<br>(n=83) | Paper-based Sample<br>(n=64) | P Value |
|----------------------------------------------------------------|-------------------------|------------------------------|---------|
| <b>HADS Anxiety (Scale range 0-21)<br/>(Median, IQR, n)</b>    | 5.00,3.00-7.75, 80      | 5.00,2.00-8.75, 64           | 0.83    |
| <b>HADS Depression (Scale range 0-21)<br/>(Median, IQR, n)</b> | 1.00,1.00-4.00, 80      | 1.00,1.00-4.00, 64           | 0.92    |
| <b>Pulmonary Function (FEV%)<br/>(Mean, SD, n)</b>             | 67.23, 25.07, 62        | 63.02, 23.90, 44             | 0.39    |
| <b>BMI<br/>(Mean, SD, n)</b>                                   | 22.01, 2.60, 67         | 21.74, 2.41, 38              | 0.60    |

### Associations between HADS scores and physical health variables

Table 3 illustrates the associations between HADS anxiety and depression scores with the physical health variables of pulmonary function and BMI for both the online and paper-based samples. The results of Spearman's correlational coefficient indicate that there was a significant negative correlation between HADS depression scores and pulmonary function for both the online ( $r=-0.39$ ,  $p=0.002$ ) and the paper-based ( $r=-0.36$ ,  $p=0.016$ ) samples. There were no significant associations between HADS anxiety scores and pulmonary function, or between HADS depression/anxiety scores and BMI for either the online or paper-based samples.

**Table 3 Association between HADS scores and health outcome variables by method of data collection (N=147)**

|                                            | Online Sample (n=83) |                          | Paper-based Sample (n=64) |                          |
|--------------------------------------------|----------------------|--------------------------|---------------------------|--------------------------|
|                                            | HADS Anxiety         | HADS Dep                 | HADS Anxiety              | HADS Dep                 |
| <b>Pulmonary Function (r, p-value*, n)</b> | -0.23, 0.09, 59      | -0.39, <b>0.002</b> , 59 | -0.19, 0.23, 44           | -0.36, <b>0.016</b> , 44 |
| <b>BMI (r, p-value, n)</b>                 | -0.08, 0.54, 64      | 0.12, 0.35, 64           | -0.08, 0.65, 38           | -0.16, 0.34, 38          |

\***Bold text represents significant p values.**

## DISCUSSION

In this cross-sectional study, we compared online and paper-based screening for depression and anxiety in adults with CF. Comparable results were found in both groups for prevalence rates and mean scores of depression and anxiety, with no statistical differences evident. Likewise, online and paper-based groups yielded similar results for associations between the mental health variables and physical health variables – pulmonary function (FEV%) and BMI. In both groups, a significant negative association was found between depression and pulmonary function; the strength of this association was comparable. Neither group was found to have significant associations between anxiety and pulmonary function or between depression/anxiety and BMI.

In contrast to our finding, a previous study that used HADS in patients with tinnitus found significantly higher rates of depression in the online group.<sup>24</sup> Self-recruitment and the option to remain anonymous was offered as a possible explanation for this finding, indicating less inhibition in reporting mental health problems.<sup>24</sup> In our study, although online participants were self-recruiting, they provided their names and contact details with the knowledge that HADS scores above clinical cut-off point would involve disclosing this information to their CF physicians to ensure appropriate follow up care. Given the small samples in both groups in our study, there is a need for further research in larger samples to compare prevalence rates and scores of depression and anxiety using online versus paper-based assessment.

To the best of our knowledge, this is the first published study comparing online versus paper-based screening of depression and anxiety in the adult CF population. Previous research comparing online versus paper-based assessment of mental health has been conducted in patients recruited from primary care or psychiatric care,<sup>22</sup> patients with tinnitus,<sup>24</sup> and in psychology students.<sup>30</sup> In these studies, regardless of the measurement used to assess anxiety and/or depression, the internal consistency for online and paper-based versions were similar. Our findings concur. In both the online and paper-based groups, the internal consistency of the HADS was comparably high, and not

1  
2  
3 significantly different. These findings suggest that online screening of mental health in adults with CF  
4 offers a reliable alternative to paper-based screening in clinic settings.

5 Our study demonstrated the potential of online mental health screening to yield higher  
6 participation rates within a shorter timeframe compared to paper-based administration during  
7 clinics (or later at home). Over a period of two weeks, 99 HADS online questionnaires were returned  
8 whereas it took twelve months to collect 64 paper-based questionnaires. There is some evidence to  
9 suggest that paper-based screening within clinic settings is a challenge. In a feasibility study<sup>31</sup> on  
10 implementing the ICMH-CF guidance<sup>11</sup> on screening for depression and anxiety symptoms during CF  
11 clinics, concerns were expressed by staff that lengthy clinic visits and a requirement to complete  
12 'another test' were barriers to paper-based screening. Giving an option to take home the screening  
13 measure for completion was also seen as problematic because it risked non-return and the  
14 possibility of missing symptoms of depression or anxiety.<sup>31</sup> A conclusion from that study was that  
15 there is a need to consider online screening outside the clinic setting to allow for faster  
16 administration and scoring.<sup>31</sup> Given the time and resource constraints of conducting mental health  
17 screening during CF clinic visits,<sup>16,31</sup> the participation rates within associated timeframes identified in  
18 our study indicate that online screening may offer a practical alternative to paper-based screening  
19 and may contribute to increased participation rates. We acknowledge that our online response rate  
20 was low at 29%. A mitigating factor precluding us from extending the online survey beyond two  
21 weeks related to timelines for study completion set by the funding bodies. It is likely that the  
22 response rate would have been higher if more time was allowed, a finding evident in a feasibility  
23 study on web-based screening of physical symptoms in patients with CF which had a response rate  
24 of 80% over a nine-month period that included repeated reminders.<sup>32</sup>

25  
26 Our online and paper-based samples differed on a number of demographic variables but they did  
27 not differ on lung function or BMI, and for both depression was associated with lower lung function.  
28 The online sample was older, more were married, living with a spouse/partner, and in full or part  
29 time employment. It could be assumed from this finding that the online sample had busier life  
30 circumstances in which case online screening may be more convenient over paper-based screening.  
31 However, caution is needed with this assumption. Further research is required to determine the  
32 factors motivating the completion of online versus paper-based mental health screening among  
33 adult patients with CF. The acceptability of online screening among adults also needs consideration.

34  
35 Mental health screening for depression and anxiety is now set to become integral to the health  
36 assessment of patients with CF based on international guidelines.<sup>11</sup> While our study demonstrates  
37 the potential of online mental health screening as a practical, efficient and reliable approach, there  
38 are issues to be considered regarding implementation into CF services. An information technology  
39 infrastructure supporting the use of electronic health records is needed to ensure a seamless  
40 paperless system. Electronic health records could be used administer, score, track and provide  
41 results to healthcare professionals compliant with data protection legislation. Peckham and  
42 colleagues found that the implementation of electronic records incorporating a coding structure for  
43 CF care into CF centres of three hospitals led to greater efficiencies such that completion of annual  
44 assessments regarding physical health more than doubled from 43% to 92%.<sup>33</sup> Furthermore,  
45 information exchange between multidisciplinary team members improved.<sup>33</sup> A recent report on the  
46 eHealth status of European Union countries showed that almost half of the member states do not  
47 have national electronic health record systems with funding being a major barrier to their  
48 implementation.<sup>34</sup> The impact of implementing electronic records that include mental health  
49 assessment and care of adults with CF remains unknown to date.

50  
51 A further consideration for clinical practice regarding online screening relates to patient feedback  
52 and follow up care. In contrast to the immediate access that healthcare professionals have to  
53 patients during clinic visits, online screening is more removed and therefore requires a planned  
54 approach to providing feedback and follow-up care. There is evidence from an Australian study on  
55  
56  
57  
58  
59

1  
2  
3 the general population that tailored feedback following online screening may not promote the use  
4 of professional services to deal with mental health problems.<sup>35</sup> In that study, mental health  
5 screening was not embedded within an existing health service that participants were using. While it  
6 could be expected that mental health screening of adults with CF that complies with the recent  
7 international guidelines<sup>11</sup> will be embedded in CF services regardless of being online or paper-based,  
8 inadequate numbers of psychosocial professionals and staff trained in mental healthcare within CF  
9 teams is a concern.<sup>16, 31</sup>

10 The findings of our study must be interpreted with some caution in light of limitations. Sample  
11 size was small in both online and paper-based groups, therefore undermining the internal and  
12 external validity of the findings. Self-selection bias exists which also threatens the internal and  
13 external validity of the findings. The comparable findings on prevalence rates of depression and  
14 anxiety between online and paper-based groups are not based on analyses that adjusted for  
15 baseline differences in demographic data e.g. age, sex, education status, and living arrangements.  
16 We did not adjust for baseline differences because of the small sample size. The cross-sectional  
17 design of the study did not allow for assessment of changes in depression and anxiety over time and  
18 what circumstances might influence these changes. Longitudinal data would help address this  
19 limitation. A further limitation relates to the assessment of psychometric properties focusing only  
20 on internal consistency. We did not compare validity between methods. During the time of  
21 conducting our study, the reliability of the HADS as a clinical screening tool was critically questioned  
22 noting that although the HADS was used in TIDES, different tools were recommended from that  
23 international study.<sup>36</sup> These tools were the PHQ-9 for depression and the GAD-7 for anxiety,<sup>4,36</sup> both  
24 of which are recommended in the international guidelines for mental health screening of patients  
25 with CF.<sup>11</sup> Albeit scant, there is some evidence that depression scores between online and paper  
26 administration of the PHQ-9 are not significantly different.<sup>37</sup> An online version of GAD-7 has been  
27 reported as reliable<sup>38</sup> but we found no evidence of comparisons with paper administration. Future  
28 research needs to compare the reliability and validity of online and paper-based versions of these  
29 screening tools in the CF population.

30 A strength of our exploratory cross-sectional analysis is that it is the first to compare online  
31 versus paper-based assessment of depression and anxiety in adults with CF. In the TIDES  
32 international study all data collection was paper-based.<sup>4</sup> Therefore, our study draws attention to the  
33 potential of online screening for depression and anxiety in adult patients with CF. The similarities in  
34 findings between both methods of administration is encouraging regarding prevalence rates of  
35 depression and anxiety, associations with pulmonary function and BMI. These findings demonstrate  
36 that online screening could be an alternative method to paper-based screening for those who:  
37 prefer this option; or miss clinic appointments, for example, due to family or work responsibilities; or  
38 wish to avoid spending extra time at clinics or annual review completing 'another test' as shown in  
39 previous research.<sup>31</sup>

## 40 CONCLUSION

41 In conclusion, some adult patients with CF experience symptoms of depression and anxiety. Both  
42 depression and anxiety can negatively impact on pulmonary function. The international  
43 recommendation for annual screening of depression and anxiety<sup>11</sup> therefore applies to patients with  
44 CF living in Ireland. This study has highlighted that online screening offers an alternative method to  
45 paper-based screening. The feasibility, acceptability, reliability and validity of online screening  
46 compared to paper-based screening needs further research.

47 **Acknowledgements** We are grateful to all adult patients with CF who participated in the study, and to all CF teams who  
48 supported access to clinics and data collection. We are also grateful to Cystic Fibrosis Ireland who supported  
49 administration of the online survey.

**Contributors** ES, IJP, AJD, KR, APF, MNIC contributed to design and application for funding. ES & JC prepared for ethical approval and negotiated access to CF centres in Ireland. JC & BH collected data. JC conducted data analysis supported by APF and EL. AH & AJD offered critical insights into mental health screening. All authors contributed to the interpretation of results. JC & ES drafted the manuscript. All authors have read, edited, and approved the manuscript.

**Funding** This work was supported by a research grant jointly funded by the Health Research Board, Ireland and Cystic Fibrosis Ireland (grant file reference: MRCG/2011/9).

**Competing interests** None declared.

**Ethics Approval** Clinical Research Ethics Committee, University College Cork (Ref no: ECM4(ii)04/12/12, and amended for online data collection-(Ref no: ECM4(ii)03/03/15).

**Data Sharing Statement** No additional data are available.

## REFERENCES

1. Mehta G, Macek M Jr, Mehta A. Cystic fibrosis across Europe: EuroCareCF analysis of demographic data from 35 countries. *J Cyst Fibros* 2010; 9: S5-21.
2. Orenstein D, Winni GB, Altma H. Cystic fibrosis: a 2002 update. *J Pediatr* 2002;140:156-64.
3. Ratjen F. Cystic fibrosis: Pathogenesis and future treatment strategies. *Respir Care* 2009; 54:595-605.
4. Quittner A, Goldbeck L, Abbott J, et al. Prevalence of depression and anxiety in patients with cystic fibrosis and parent caregivers: results of The International Depression Epidemiological Study across nine countries. *Thorax* 2014; 69:1090-7.
5. Duff A, Abbott J, Cowperthwaite C, et al. Depression and anxiety in adolescents and adults with cystic fibrosis in the UK: A cross-sectional study. *J Cyst Fibros* 2014;13(6):745-53.
6. Modi A, Driscoll KA, Montag-Leifling K, et al. Screening for symptoms of depression and anxiety in adolescents and young adults with cystic fibrosis. *Pediatr Pulmonol* 2011; 46:153-59.
7. Goldbeck L, Besier T, Hinz A, et al. Prevalence of symptoms of anxiety and depression with cystic fibrosis. *CHEST* 2010;138:929-36.
8. Besier T, Goldbeck L. Anxiety and depression in adolescents with CF and their caregivers. *J Cyst Fibros* 2011;10:435-42.
9. Oliveira C, Sole A, Girón RM, et al. Depression and anxiety symptoms in Spanish adult patients with cystic fibrosis: associations with health-related quality of life. *Gen Hosp Psychiatry* 2016;40:39-46.
10. Smyth A, Bell SC, Bojcin S, et al. European Cystic Fibrosis Society standards of care: Best practice guidelines. *J Cyst Fibros* 2014;13(1):S23-42.
11. Quittner A, Abbott J, Georgiopoulos, AM, et al. International Committee on Mental Health in Cystic Fibrosis: Cystic Fibrosis Foundation and European Cystic Fibrosis Society consensus statements for screening and treating depression and anxiety. *Thorax* 2016; 71: 26-34.
12. Yohannes A, Willgoss TM, Fatoye FA, et al. Relationship between anxiety, depression, and quality of life in adult patients with cystic fibrosis. *Respir Care* 2012;57(4):550-56.
13. Havermans T, Colpaert K, Dupont LJ. Quality of life in patients with cystic fibrosis: Association with anxiety and depression. *J Cyst Fibros* 2008;7:581-84.
14. Riekert K, Bartlett SJ, Boyle MP, et al. The association between depression, lung function, and health-related quality of life among adults with cystic fibrosis. *CHEST* 2007;132:231-237.
15. Quon B, Bentham WD, Unutzer J, et al. Prevalence of symptoms of depression and anxiety in adults with cystic fibrosis based on the PHQ-9 and GAD-7 screening questionnaires. *Psychosomatics* 2015;56:345-53

16. Abbott J, Elborn JS, Georgiopoulos AM, et al. Cystic Fibrosis Foundation and European Cystic Fibrosis Society Survey of cystic fibrosis mental health care delivery. *J Cyst Fibros* 2015;14:533–39.
17. Ogles B, France C, Lunnen K, et al. Computerized depression screening and awareness. *Community Ment Health Journal* 1998;34(1):27-38.
18. Houston T, Cooper et al. Screening the public for depression through the internet. *Psychiatr Services* 2001;52(3):362-67.
19. Carlson L, Groff S, Maciejewski O, et al. Screening for distress in lung and breast cancer outpatients: a randomized controlled trial. *J Clin Oncol* 2010;20(28):33-43.
20. Drake E, Howard E, Kinsey E. Online screening and referral for postpartum depression: an exploratory study. *Community Ment Health J* 2014;50(3):305-11.
21. Gill S, Contreras O, Munoz R, et al. Participant retention in an automated online monthly depression rescreening program: patterns and predictors. *Internet Interv* 2014;1(1):20-25.
22. Holländare F, Andersson G, Engström I. A comparison of psychometric properties between internet and paper versions of two depression instruments (BDI-II and MADRS-S) administered to clinic patients. *J Med Internet Res* 2010;12(5):E49.
23. Trustram Eve C, de Jag CA. Piloting and validation of a self-administered online cognitive screening tool in normal older persons: The cognitive function test. *Int J of Geriatr Psychiatr* 2014;29:198-206.
24. Andersson G, Kaldo-Sandstrom V, Stroma L, et al. Internet administration of the Hospital Anxiety and Depression Scale in a sample of tinnitus patients. *J Psychosom Res.* 2003;55:259-62.
25. Cystic Fibrosis Registry of Ireland *Cystic Fibrosis Registry of Ireland 2012 Annual Report*. Dublin: Cystic Fibrosis Registry of Ireland, 2012.
26. Savage E, McCarron, S. Research access to adolescents and young adults. *Appl Nurs Res* 2009;22:63-7.
27. Landers M, McCarthy G, Savage E. Challenges in recruiting participants in a multi-centre study on symptom experiences and self care strategies of bowel symptoms following colorectal surgery. *J Res Nurs* 2012;17(5):497-506.
28. Zigmond A, Snaith R. The Hospital Anxiety and Depression Scale. *Acta Psychiatrica Scandinavica* 1983;67: 361-70.
29. Bjelland I, Dahl A, Haug T, et al. The validity of the Hospital Anxiety and Depression Scale: an updated literature review. *J Psychosom Res* 2002; 52: 69-77.
30. Vallejo MA, Jordan CM, Diaz MI, et al. Psychological assessment via the internet: a reliability and validity study of online (vs paper-and-pencil) versions of the General Health Questionnaire-28 (GHQ-28) and the Symptoms Check-List-90-Revised (SCL-90-R). *J Med Internet Res* 2007; 9: 1-10.
31. Duff AJ, Bowmer G, Waldron R, et al. Implementing ICMH-CF (International Committee on Mental Health in CF) guidance on screening for depression and anxiety symptoms: A feasibility and pilot study. *J Cyst Fibros* 2016; 15: 33-4.
32. Balzano J, Fresenius A, Walker P, et al. Web-based symptom screening in cystic fibrosis patients: A feasibility study. *J Cyst Fibros* 2016; 15: 102-8.
33. Peckham, D, Etherington C, White H, et al. The development and deployment of integrated electronic care records in a regional adult and paediatric cystic fibrosis unit. *J Cyst Fibros* 2014; 13: 681-6.
34. World Health Organization. From innovation to implementation: eHealth in the WHO European Region. 2016; [http://www.euro.who.int/\\_\\_data/assets/pdf\\_file/0012/302331](http://www.euro.who.int/__data/assets/pdf_file/0012/302331) (accessed 9 August 2017)
35. Batterham PJ, Calear AL, Sunderland M, et al. Online screening and feedback to increase help-seeking for mental health problems: population-based randomised controlled trial. *Br J Psychol* 2016; 2: 67-73.

- 1
- 2
- 3 36. Webb AK, Bryon M. The International Depression Epidemiological Study (TIDES): unfinished
- 4 business? *Thorax* 2014; 69: 1067-8.
- 5 37. Bot AG, Menendez ME, Neuhaus V. et al. The comparison of paper- and web-based
- 6 questionnaires in patients with hand and upper extremity illness. *Hand* 2013; 8: 2010-4.
- 7 38. Donker T, van Straten A, Marks I, et al. Quick and easy self-rating of Generalized Anxiety
- 8 Disorder: validity of the Dutch web-based GAD-7, GAD-2 and GAD-SI. *Psychiatr Res* 2011;
- 9 188: 58-64.
- 10
- 11
- 12
- 13
- 14
- 15
- 16
- 17
- 18
- 19
- 20
- 21
- 22
- 23
- 24
- 25
- 26
- 27
- 28
- 29
- 30
- 31
- 32
- 33
- 34
- 35
- 36
- 37
- 38
- 39
- 40
- 41
- 42
- 43
- 44
- 45
- 46
- 47
- 48
- 49
- 50
- 51
- 52
- 53
- 54
- 55
- 56
- 57
- 58
- 59
- 60

**STROBE 2007 (v4) checklist of items to be included in reports of observational studies in epidemiology\***  
**Checklist for cohort, case-control, and cross-sectional studies (combined)**

| Section/Topic        | Item # | Recommendation                                                                                                                                                                                                                                                                                                                                                                                                                                                         | Reported on page #                                                                                                                                                                                                                                                                                         |
|----------------------|--------|------------------------------------------------------------------------------------------------------------------------------------------------------------------------------------------------------------------------------------------------------------------------------------------------------------------------------------------------------------------------------------------------------------------------------------------------------------------------|------------------------------------------------------------------------------------------------------------------------------------------------------------------------------------------------------------------------------------------------------------------------------------------------------------|
| Title and abstract   | 1      | (a) Indicate the study's design with a commonly used term in the title or the abstract                                                                                                                                                                                                                                                                                                                                                                                 | Title page & Abstract (pg.2)                                                                                                                                                                                                                                                                               |
|                      |        | (b) Provide in the abstract an informative and balanced summary of what was done and what was found                                                                                                                                                                                                                                                                                                                                                                    | Pg.2 within Abstract.                                                                                                                                                                                                                                                                                      |
| <b>Introduction</b>  |        |                                                                                                                                                                                                                                                                                                                                                                                                                                                                        |                                                                                                                                                                                                                                                                                                            |
| Background/rationale | 2      | Explain the scientific background and rationale for the investigation being reported                                                                                                                                                                                                                                                                                                                                                                                   | Pg 3                                                                                                                                                                                                                                                                                                       |
| Objectives           | 3      | State specific objectives, including any pre-specified hypotheses                                                                                                                                                                                                                                                                                                                                                                                                      | Pg 4 – last paragraph of Introduction.                                                                                                                                                                                                                                                                     |
| <b>Methods</b>       |        |                                                                                                                                                                                                                                                                                                                                                                                                                                                                        |                                                                                                                                                                                                                                                                                                            |
| Study design         | 4      | Present key elements of study design early in the paper                                                                                                                                                                                                                                                                                                                                                                                                                | Pg 4 – first section of Methods.                                                                                                                                                                                                                                                                           |
| Setting              | 5      | Describe the setting, locations, and relevant dates, including periods of recruitment, exposure, follow-up, and data collection                                                                                                                                                                                                                                                                                                                                        | Pg 4-Setting/ locations-First section of Methods;<br>Pg 4- Dates & period of recruitment-line 49;<br>Pg 4 Exposure –reference to depression & anxiety –line 15;<br>Pg4 Data Collection Procedures section (last paragraph) & pg 5 (first paragraph)- Data collection procedure for paper-based and online. |
| Participants         | 6      | (a) <i>Cohort study</i> —Give the eligibility criteria, and the sources and methods of selection of participants. Describe methods of follow-up<br><i>Case-control study</i> —Give the eligibility criteria, and the sources and methods of case ascertainment and control selection. Give the rationale for the choice of cases and controls<br><i>Cross-sectional study</i> —Give the eligibility criteria, and the sources and methods of selection of participants | (c) Pg 4 in Section on Participants & Recruitment.                                                                                                                                                                                                                                                         |
|                      |        | (b) <i>Cohort study</i> —For matched studies, give matching criteria and number of exposed and unexposed<br><i>Case-control study</i> —For matched studies, give matching criteria and the number of controls per case                                                                                                                                                                                                                                                 |                                                                                                                                                                                                                                                                                                            |
| Variables            | 7      | Clearly define all outcomes, exposures, predictors, potential confounders, and effect modifiers. Give diagnostic criteria, if applicable                                                                                                                                                                                                                                                                                                                               | Pg 5. Sociodemographic variables and physical health variables described in section on Measures – paragraph 1.                                                                                                                                                                                             |



|                           |     |                                                                                                                                                                                                                                                                                   |                                                                                                          |
|---------------------------|-----|-----------------------------------------------------------------------------------------------------------------------------------------------------------------------------------------------------------------------------------------------------------------------------------|----------------------------------------------------------------------------------------------------------|
|                           |     |                                                                                                                                                                                                                                                                                   | Pg 5: Variables of depression and anxiety addressed in section on Measures -2 <sup>nd</sup> paragraph.   |
| Data sources/ measurement | 8*  | For each variable of interest, give sources of data and details of methods of assessment (measurement). Describe comparability of assessment methods if there is more than one group                                                                                              | Pg. 5 – Measures Section.                                                                                |
| Bias                      | 9   | Describe any efforts to address potential sources of bias                                                                                                                                                                                                                         | Pg.4 Participants and Recruitment (efforts to recruit from all 6 CF Centres for population based sample. |
| Study size                | 10  | Explain how the study size was arrived at                                                                                                                                                                                                                                         | Pg. 4. Participants and recruitment                                                                      |
| Quantitative variables    | 11  | Explain how quantitative variables were handled in the analyses. If applicable, describe which groupings were chosen and why                                                                                                                                                      | Pg. 5. Statistical analysis section                                                                      |
| Statistical methods       | 12  | (a) Describe all statistical methods, including those used to control for confounding                                                                                                                                                                                             | Pg 5. Statistical analysis section                                                                       |
|                           |     | (b) Describe any methods used to examine subgroups and interactions                                                                                                                                                                                                               | Pg. 5. Statistical analysis section                                                                      |
|                           |     | (c) Explain how missing data were addressed                                                                                                                                                                                                                                       | Pg. 6. First paragraph on page. Statistical analysis section                                             |
|                           |     | (d) Cohort study—If applicable, explain how loss to follow-up was addressed<br>Case-control study—If applicable, explain how matching of cases and controls was addressed<br>Cross-sectional study—If applicable, describe analytical methods taking account of sampling strategy | Pg. 5. Statistical analysis section. Details of how online and paper based samples were compared         |
|                           |     | (e) Describe any sensitivity analyses                                                                                                                                                                                                                                             | NA                                                                                                       |
| <b>Results</b>            |     |                                                                                                                                                                                                                                                                                   |                                                                                                          |
| Participants              | 13* | (a) Report numbers of individuals at each stage of study—eg numbers potentially eligible, examined for eligibility, confirmed eligible, included in the study, completing follow-up, and analysed                                                                                 | Pg. 6. Results section on demographic characteristics                                                    |
|                           |     | (b) Give reasons for non-participation at each stage                                                                                                                                                                                                                              | In Data Collection Procedures –Pg. 5- Line 3& 4, and line 10&11                                          |
|                           |     | (c) Consider use of a flow diagram                                                                                                                                                                                                                                                | NA                                                                                                       |
| Descriptive data          | 14* | (a) Give characteristics of study participants (eg demographic, clinical, social) and information on exposures and potential confounders                                                                                                                                          | Pg. 6. Results section on demographic characteristics                                                    |
|                           |     | (b) Indicate number of participants with missing data for each variable of interest                                                                                                                                                                                               | Pgs. 6-8. Tables in results section indicate number of participants for each variable (n)                |
|                           |     | (c) Cohort study—Summarise follow-up time (eg, average and total amount)                                                                                                                                                                                                          | NA                                                                                                       |
| Outcome data              | 15* | Cohort study—Report numbers of outcome events or summary measures over time                                                                                                                                                                                                       | NA                                                                                                       |
|                           |     | Case-control study—Report numbers in each exposure category, or summary                                                                                                                                                                                                           | NA                                                                                                       |

|                          |    |                                                                                                                                                                                                              |                                                                                  |
|--------------------------|----|--------------------------------------------------------------------------------------------------------------------------------------------------------------------------------------------------------------|----------------------------------------------------------------------------------|
|                          |    | measures of exposure                                                                                                                                                                                         |                                                                                  |
|                          |    | <i>Cross-sectional study</i> —Report numbers of outcome events or summary measures                                                                                                                           | Pg. 7 Sections on prevalence, HADS scores and physical health outcome variables  |
| Main results             | 16 | (a) Give unadjusted estimates and, if applicable, confounder-adjusted estimates and their precision (eg, 95% confidence interval). Make clear which confounders were adjusted for and why they were included | Pg. 7. Section on prevalence of anxiety and depression                           |
|                          |    | (b) Report category boundaries when continuous variables were categorized                                                                                                                                    | Pg. 7 Section on prevalence of anxiety and depression                            |
|                          |    | (c) If relevant, consider translating estimates of relative risk into absolute risk for a meaningful time period                                                                                             | NA                                                                               |
| Other analyses           | 17 | Report other analyses done—eg analyses of subgroups and interactions, and sensitivity analyses                                                                                                               | Pg. 8. Section on associations between HADS scores and physical health variables |
| <b>Discussion</b>        |    |                                                                                                                                                                                                              |                                                                                  |
| Key results              | 18 | Summarise key results with reference to study objectives                                                                                                                                                     | Pg.8 paragraph 1.                                                                |
| Limitations              | 19 | Discuss limitations of the study, taking into account sources of potential bias or imprecision. Discuss both direction and magnitude of any potential bias                                                   | Pg 10. Paragraph 2(from line 11)                                                 |
| Interpretation           | 20 | Give a cautious overall interpretation of results considering objectives, limitations, multiplicity of analyses, results from similar studies, and other relevant evidence                                   | Pg 10 & 11 within discussion.                                                    |
| Generalisability         | 21 | Discuss the generalisability (external validity) of the study results                                                                                                                                        | Pg. 10 paragraph 2.                                                              |
| <b>Other information</b> |    |                                                                                                                                                                                                              |                                                                                  |
| Funding                  | 22 | Give the source of funding and the role of the funders for the present study and, if applicable, for the original study on which the present article is based                                                | Pg. 11 Line 9.                                                                   |

\*Give information separately for cases and controls in case-control studies and, if applicable, for exposed and unexposed groups in cohort and cross-sectional studies.

**Note:** An Explanation and Elaboration article discusses each checklist item and gives methodological background and published examples of transparent reporting. The STROBE checklist is best used in conjunction with this article (freely available on the Web sites of PLoS Medicine at <http://www.plosmedicine.org/>, Annals of Internal Medicine at <http://www.annals.org/>, and Epidemiology at <http://www.epidem.com/>). Information on the STROBE Initiative is available at [www.strobe-statement.org](http://www.strobe-statement.org).

# BMJ Open

## Online versus paper-based screening for depression and anxiety in adults with cystic fibrosis in Ireland: a cross-sectional exploratory study

|                                 |                                                                                                                                                                                                                                                                                                                                                                                                                                                                                                                                                                                                                                                                                                                                                                                                                                                                                                                                                                                                                                                                                                                                 |
|---------------------------------|---------------------------------------------------------------------------------------------------------------------------------------------------------------------------------------------------------------------------------------------------------------------------------------------------------------------------------------------------------------------------------------------------------------------------------------------------------------------------------------------------------------------------------------------------------------------------------------------------------------------------------------------------------------------------------------------------------------------------------------------------------------------------------------------------------------------------------------------------------------------------------------------------------------------------------------------------------------------------------------------------------------------------------------------------------------------------------------------------------------------------------|
| Journal:                        | <i>BMJ Open</i>                                                                                                                                                                                                                                                                                                                                                                                                                                                                                                                                                                                                                                                                                                                                                                                                                                                                                                                                                                                                                                                                                                                 |
| Manuscript ID                   | bmjopen-2017-019305.R1                                                                                                                                                                                                                                                                                                                                                                                                                                                                                                                                                                                                                                                                                                                                                                                                                                                                                                                                                                                                                                                                                                          |
| Article Type:                   | Research                                                                                                                                                                                                                                                                                                                                                                                                                                                                                                                                                                                                                                                                                                                                                                                                                                                                                                                                                                                                                                                                                                                        |
| Date Submitted by the Author:   | 15-Nov-2017                                                                                                                                                                                                                                                                                                                                                                                                                                                                                                                                                                                                                                                                                                                                                                                                                                                                                                                                                                                                                                                                                                                     |
| Complete List of Authors:       | Cronly , Jennifer ; University College Cork National University of Ireland, School of Nursing & Midwifery<br>Duff , Alistair ; Leeds Teaching Hospitals NHS Trust, Department of Clinical Psychology<br>Riekert, Kristin A.; John Hopkins University , School of Medicine<br>Perry, Ivan; University College Cork National University of Ireland, School of Epidemiology and Public Health<br>Fitzgerald, Anthony; University College Cork National University of Ireland, School of Epidemiology and Public Health ; University College Cork National University of Ireland, Department of Statistics<br>Horgan, Aine ; University College Cork National University of Ireland, School of Nursing & Midwifery<br>Lehane, Elaine; University College Cork National University of Ireland, School of Nursing & Midwifery<br>Howe, Barbara ; University College Cork National University of Ireland, School of Nursing & Midwifery<br>Ni Chroinin , Muireann ; Cork University Hospital Group, Department of Paediatrics<br>Savage, Eileen; University College Cork National University of Ireland, School of Nursing & Midwifery |
| <b>Primary Subject Heading</b>: | Mental health                                                                                                                                                                                                                                                                                                                                                                                                                                                                                                                                                                                                                                                                                                                                                                                                                                                                                                                                                                                                                                                                                                                   |
| Secondary Subject Heading:      | Respiratory medicine                                                                                                                                                                                                                                                                                                                                                                                                                                                                                                                                                                                                                                                                                                                                                                                                                                                                                                                                                                                                                                                                                                            |
| Keywords:                       | Anxiety, Cystic fibrosis < THORACIC MEDICINE, Depression, Online versus paper based screening, Prevalence, Pulmonary function                                                                                                                                                                                                                                                                                                                                                                                                                                                                                                                                                                                                                                                                                                                                                                                                                                                                                                                                                                                                   |
|                                 |                                                                                                                                                                                                                                                                                                                                                                                                                                                                                                                                                                                                                                                                                                                                                                                                                                                                                                                                                                                                                                                                                                                                 |

SCHOLARONE™  
Manuscripts

## TITLE PAGE

**Online versus paper-based screening for depression and anxiety in adults with cystic fibrosis in Ireland: a cross-sectional exploratory study****Corresponding Author:**

Eileen Savage  
School of Nursing & Midwifery,  
Brookfield Health Sciences Complex,  
University College Cork  
Cork,  
Ireland.

Email: [e.savage@ucc.ie](mailto:e.savage@ucc.ie)

Tel: 353 (0)21 4901554

Fax: 353 (0)21 4901493

Note: corresponding author names last below.

**Co-Authors (& Corresponding author named last)**

Cronly, Jennifer,<sup>1</sup> Duff, Alistair J.,<sup>2</sup> Riekert, Kristin A,<sup>3</sup> Perry, Ivan J.,<sup>4</sup> Fitzgerald, Anthony P.,<sup>4,5</sup> Horgan, Aine,<sup>1</sup> Lehane, Elaine,<sup>1</sup> Howe, Barbara,<sup>1</sup> Ni Chroinin, Muireann,<sup>6</sup> Savage, E.<sup>1</sup>

<sup>1</sup>School of Nursing & Midwifery, Brookfield Health Sciences Complex, University College Cork, Cork, Ireland

<sup>2</sup>Department of Clinical Psychology, Leeds Teaching Hospitals NHS Trust, Leeds, UK.

<sup>3</sup>School of Medicine, John Hopkins University, Baltimore, Maryland, USA.

<sup>4</sup>School of Epidemiology and Public Health, Western Gateway Building, University College Cork, Cork, Ireland

<sup>5</sup>Department of Statistics, Western Gateway Building, University College Cork, Cork, Ireland

<sup>6</sup> Department of Paediatrics, Cork University Hospital, Wilton, Cork, Ireland.

**Keywords:** Anxiety, Cystic fibrosis, Depression, Mental health, Online versus paper-based screening.

Word count: 4208 (excluding title page, abstract, references, figures and tables).

## ABSTRACT

**Objective:** To compare online and paper-based screening for depression and anxiety in adults with cystic fibrosis (CF).

**Design and Setting:** Cross-sectional study in CF clinics in Ireland and through the Cystic Fibrosis Ireland online community.

**Participants:** 160 adult patients aged 18 or above were recruited. Of these, 147 were included in the analysis; 83 online and 64 paper-based. The remaining 13 were excluded because of incomplete data.

**Measures:** Depression and anxiety were measured using the Hospital Anxiety and Depression Scale (HADS). Data on pulmonary function (FEV1%) and BMI were self-reported based on clinic assessments. Socio-demographic data were collected.

**Results:** Compared to the paper-based participants, the online participants were more likely to be female (61.7% vs 48.4%), older (mean 32.2 vs 28.2 years) and were more likely to be married (32.5% vs 15.6%), living with their spouse or partner (42.5% vs 22.6%), and working either full time (33.7% vs 15.9%) or part-time (30.1% vs 17.5%). The prevalence rates of elevated anxiety and depression were not significantly different ( $p=0.71$  &  $p=0.56$ ). HADS anxiety and depression scores were not statistically different between online ( $p=0.83$ ) and paper-based ( $p=0.92$ ) participants based on Mann-Whitney U test. A significant negative correlation was found between depression and pulmonary function ( $r=-0.39$ ,  $p=0.01$ ) and anxiety and pulmonary function ( $r=-0.36$ ,  $p=0.02$ ). Based on Cronbach's alpha, there were no statistically significant differences between the online and paper-based participants on the internal consistency of the HADS anxiety ( $p=0.073$ ) and depression ( $p=0.378$ ) scales.

**Conclusions:** Our findings suggest that online and paper-based screening for depression and anxiety in adult patients with CF yield comparable findings on prevalence rates and scores, associations with health, and internal consistency of subscales. This study highlights that online screening offers an alternative method to paper-based screening. Further research with a larger sample is needed to confirm our results.

## Strengths and Limitations of this Study

- This is the first study to explore online compared to paper-based screening of depression and anxiety in an adult population of patients with CF.
- Given the recent publication on international guidelines for depression and anxiety screening in the CF population, our study is timely because it draws attention to online screening as an alternative method to paper-based screening.
- The small sample size and self-selection bias in this study are threats to its internal and external validity.
- Assessment of psychometric properties of the HADS was limited to internal consistency and further research is needed on the full scope of reliability and validity of scales used to assess depression and anxiety in the CF population, noting that the recent international guidelines support the use of the PHQ-9 for depression and GAD-7 for anxiety.

## INTRODUCTION

Cystic fibrosis (CF) is chronic, progressive and life-shortening, although increased survival rates into middle adulthood are now expected because of treatment and management advances.<sup>1</sup> The disease is characterised in part by increased susceptibility to recurrent chest infections due to excessive

1  
2  
3 production of mucous in the small respiratory airways. In addition, obstruction of pancreatic enzyme  
4 secretion due to increased mucous production in the gastrointestinal tract results in poor growth  
5 and weight loss.<sup>2</sup>

6 To date, most research efforts has focussed on understanding the pathophysiology of CF and the  
7 most promising treatment strategies.<sup>3</sup> However, in recent years there has been a growing body of  
8 research on the psychological health of individuals with CF, particularly on the prevalence of  
9 depression and anxiety, and their associations with physical health. The International  
10 Depression/Anxiety Study (TIDES) is a landmark collaboration across several European countries and  
11 the USA which screened for depression and anxiety in the CF adult and adolescent populations, and  
12 parent caregivers.<sup>4-9</sup> In adults with CF, elevated depression and anxiety scores were associated with  
13 poorer lung function and quality of life.<sup>4,5</sup> One of the main conclusions of TIDES was to recommend  
14 annual screening of patients with CF for symptoms of depression and anxiety, so that those affected  
15 receive timely further assessment and treatment<sup>4</sup>. This was endorsed by the European Cystic  
16 Fibrosis Society's (ECFS) *Standards of Care* published in 2014.<sup>10</sup> In 2016, guidelines for screening and  
17 treating depression and anxiety from the International Committee on Mental Health in Cystic  
18 Fibrosis (ICMH-CF) were published recommending that annual screening be conducted by health  
19 care professionals, preferably mental health specialists.<sup>11</sup>

20 Studies on screening for depression and anxiety in patients with CF and their parent caregivers  
21 have collected data during clinic visits with high response rates.<sup>5,7,12-15</sup> However, high response rates  
22 seen in research may not be feasible within the context of routine clinic visits or annual review  
23 assessments. CF teams may face significant challenges in implementing screening for depression and  
24 anxiety. In a large scale study on CF mental health delivery,<sup>16</sup> limited staff time and limited  
25 personnel were ranked as the two highest barriers to implementing a mental health screening  
26 programme. Access to electronic tools for screening administration and scoring was ranked by 40%  
27 of respondents as among the top three areas that would be helpful in implementing mental health  
28 screening.<sup>16</sup> Yet, to date, little consideration has been given to the possibility of online screening of  
29 patients with CF for depression and anxiety.

30 Computerised screening for depression has been available since the 1990s,<sup>17</sup> with the potential  
31 for internet-based screening of large populations.<sup>18</sup> Online screening for depression and/or anxiety  
32 has been used in clinical populations such as lung and breast cancer patients,<sup>19</sup> and women with  
33 postpartum depression.<sup>20</sup> Advantages of online screening include reduced costs,<sup>20</sup> an ability to  
34 assess large populations,<sup>18,21</sup> feasibility and acceptability for patients to use,<sup>20</sup> and a practical  
35 approach to screening for clinical teams.<sup>22</sup> Reported disadvantages of online screening are the  
36 possibility that older adults may be less likely to participate,<sup>18</sup> the need for computer literacy,<sup>23</sup> and  
37 that response or retention rates may be low.<sup>21</sup>

38 There has been no research to date comparing the results of online and paper-based assessment  
39 of mental health among patients with CF. Comparisons have been made in patients with tinnitus<sup>24</sup>  
40 using the Hospital Anxiety and Depression Scale (HADS). Compared to the clinic paper-based sample,  
41 the online sample had higher prevalence rates of depression (17% vs 15%) and anxiety (25% vs 15%)  
42 and had significantly higher scores for both which the researchers speculated may have been due to  
43 anonymised self-recruitment offering an internet intervention on psychological support. Other  
44 researchers compared psychometric properties between online and paper versions of depression  
45 instruments administered to primary care and psychiatric care patients.<sup>22</sup> The findings indicated  
46 equivalence and no clinically relevant differences between method of administration with high  
47 correlations found between both scores. It is not possible to draw conclusions from existing research  
48 for the CF population because of the different clinical populations.

1  
2  
3 The aim of this study was to compare online versus clinic paper-based assessment of depression  
4 and anxiety in a CF adult population in Ireland in relation to sample characteristics, prevalence data,  
5 and associations with physical health (pulmonary function and BMI). In addition, the study aimed to  
6 compare online and paper versions for internal consistency of the depression and anxiety measure,  
7 which for this study was the HADS.  
8  
9

## 10 **METHODS**

### 11 **Study design and setting**

12 We conducted this exploratory study as part of a larger cross-sectional study in Ireland on the  
13 national prevalence of depression and anxiety in the CF population and associations with physical  
14 health and quality of life. The larger study included adolescents, their caregivers and adult patients.  
15 This paper reports on the adult data. We aimed to collect data from adults in all six adult CF centres  
16 in Ireland. At the outset, we intended to collect data during scheduled clinic visits similar to the  
17 studies involved in TIDES,<sup>4</sup> and ethical approval was obtained for this. However, due to problems  
18 with recruitment (described below), data were also collected online.  
19  
20  
21

### 22 **Participants and recruitment**

23 The study aimed to recruit adults with CF aged 18 years or over. The only exclusion criteria were  
24 adults who had received lung or heart-lung transplantation. Data available from the CF Registry of  
25 Ireland at the outset of the study indicated that the total adult population with CF aged 18 years and  
26 over was 595.<sup>25</sup> In order to estimate the true proportion of depression and anxiety within a  
27 confidence interval of +/- 3% for this population size, it was calculated that we needed to recruit 382  
28 adults.  
29

30 Our initial plan was to recruit adults during scheduled clinic visits at the CF centres. We sought  
31 access to the study sample through the CF teams by writing to the Consultant Respiriologists  
32 informing them about the study. We offered to meet the CF teams to discuss the study further, and  
33 a meeting was held in three of the six centres.  
34

35 For three of the CF centres, access was generally unproblematic and was supported by the CF  
36 healthcare team. Access was not achieved in one centre because of no response to our efforts to  
37 contact the relevant respiratory consultants. In two centres, staffing resource constraints made data  
38 collection at clinics impossible. Research access to clinical sites can be challenging and is reliant on  
39 key gatekeepers in the services.<sup>26,27</sup> Even in the remaining three clinics where we did have access,  
40 data collection was slow because of time constraints for adults in completing questionnaires or busy  
41 workloads of clinic staff making it difficult to administer questionnaires during clinic appointments.  
42 In view of the challenges faced in collecting data, we reapplied for ethical approval to recruit adults  
43 online through the Cystic Fibrosis Ireland community network.  
44  
45

### 46 **Data Collection Procedures**

47 Data collection occurred between July 2014 and July 2015. At clinics, patients were approached by a  
48 member of the CF multidisciplinary team and asked to participate in the study. Patients were  
49 informed that if they scored above the clinical cut-off for depression and/or anxiety symptoms, their  
50 CF consultant would be informed to ensure appropriate follow-up and psychological support. For  
51 this reason, data collection was not anonymous. After obtaining informed consent, patients were  
52 given the questionnaire pack which could be completed on site or at home and returned to the  
53 research team by stamped addressed envelope. Data collection was slow such that over a period of  
54 twelve months, paper-based data collection was completed for just 64 adults across three CF  
55 centres. Of these, 39 completed the questionnaire on site during a clinic visit, and 25 completed the  
56  
57  
58  
59  
60

questionnaire at home. The questionnaire took approximately 15-20 minutes to complete. The response rates in the three centres were 53%, 52% and 29%. The overall response rate for the clinic sample was 51%. Patients were not specifically asked for reasons for non-participation but some volunteered that they were 'not interested' or already involved in other research projects.

The online version of the questionnaire was developed and administered using the online survey development software, Survey Monkey. The link to the questionnaire, information sheet and consent form was emailed by the administrator of the Cystic Fibrosis Ireland (CFI) community network to 345 adults with CF with one follow-up reminder after 7 days. After a period of two weeks, 99 responses were collected which was a response rate of 29%; reasons for non-participation could not be gleaned. The invitation email clearly instructed that if the questionnaire was already completed during a clinic visit, there was no need to complete the online survey. We cross-checked all returned online questionnaires with paper-based questionnaires for duplication and removed 3 duplicates.

In total, 160 adult patients aged 18 or over were recruited from CF clinics or online. Of these, 147 were included in the analysis of whom 83 were the online sample and 64 were the paper-based sample. The remaining 13 respondents were excluded because of incomplete data. With 595 adults entered in the CF Registry of Ireland,<sup>25</sup> the sample size of 147 represented 27.6% of the adult CF population in Ireland.

### Measures

Study packs contained: an information leaflet and consent form; a background information questionnaire; and the HADS.<sup>28</sup> The background information questionnaire gathered socio-demographic data such as age, gender, marital status, living arrangements, and educational and employment information as well as a section on physical and mental health information. In this section, participants were asked to provide self-reported data, based on their most recent clinic visit, on their pulmonary function (FEV1%), and height (cm) and weight (kg) which were used to calculate Body Mass Index.

The HADS is a brief 14-item instrument used for screening depression (7 items) and anxiety symptoms (7 items). Each item requires the participant to select one statement from four options on a Likert scale. Scores range from a minimum of 0 to a maximum of 21 for both anxiety and depression. The HADS has well established clinical cut-off scores with a score higher than 7 indicating elevated symptoms of anxiety or depression and a score higher than 10 indicating anxiety or depression in the clinically significant range. The HADS has good psychometric properties as indicated by analysis of internal consistency, discriminant validity and factor structure.<sup>29</sup> It was also the instrument used in TIDES to assess anxiety and depression symptoms in CF patients,<sup>4</sup> although since then the PHQ-9 for depression and GAD-7 for anxiety have been recommended through international consensus.<sup>11</sup> A referral process for follow-up psychological support was in place for participants with elevated depression and anxiety scores.

### Statistical analysis

Data were analysed using SPSS version 22.0 for Windows. To determine if there were statistically significant differences between the online and paper-based samples on demographic variables, independent samples t-tests and chi-square tests were run. In cases where 80% of expected cell count were not greater than five, or all expected cell counts were not greater than one, Fisher's Exact Test was used. As the HADS data did not meet requirements of the normal distribution, the median and interquartile range are reported, and the Mann-Whitney U test was run to compare the online and paper-based samples. Prevalence of elevated and clinically significant anxiety and depression in online and paper-based samples were compared using Chi-square tests. The mean and



standard deviation of physical health outcome variables, pulmonary function and BMI, are reported and the online and paper-based samples were compared using independent samples t-tests. To examine the relationship between HADS scores and physical outcome variables, Spearman's correlational coefficients were calculated. Cronbach's alpha was used to examine the internal consistency of the HADS anxiety and depression scales for both the online and paper-based samples, and Fishers Bonett test was used to examine statistically significant differences in Cronbach's alpha between the two samples. Missing data were excluded from the analysis.

## RESULTS

### Demographic characteristics of online and clinic samples

A total of 147 adults with CF participated in the study. Of these, 56.5% (n=83) completed online and 43.5% (n=64) completed paper-based questionnaires. The demographic characteristics of the online and paper-based samples are presented in Table 1. Significant differences were detected between the two groups in the demographic variables of age (p=0.008), marital status (p=0.044), general living arrangements (p=0.024) and employment status (p=0.005). There were no clear differences between the two groups for level of education.

**Table 1 Characteristics of adults with CF by method of data collection (N=147)**

|                                     | Online Sample<br>(n=83) | Paper-based<br>Sample<br>(n=64) | P Value*     |
|-------------------------------------|-------------------------|---------------------------------|--------------|
| Age in years – Mean (SD)            | 32.2 (7.3)              | 28.2 (10.6)                     | <b>0.008</b> |
| Gender – n (%)                      |                         |                                 | 0.131        |
| Males                               | 31 (38.3)               | 33 (51.6)                       |              |
| Females                             | 50 (61.7)               | 31 (48.4)                       |              |
| Marital status – n (%)              |                         |                                 | <b>0.044</b> |
| Single                              | 37 (44.6)               | 42 (65.6)                       |              |
| Married                             | 27 (32.5)               | 10 (15.6)                       |              |
| ...With partners                    | 18 (21.7)               | 11 (17.2)                       |              |
| ...Separated                        | 1 (1.2)                 | 1 (1.6)                         |              |
| General Living Arrangements         |                         |                                 | <b>0.024</b> |
| ...With parents                     | 28 (35.0)               | 37 (59.7)                       |              |
| ...With partner/spouse              | 34 (42.5)               | 14 (22.6)                       |              |
| ...With housemates                  | 8 (10)                  | 7 (11.3)                        |              |
| ...Alone                            | 10 (12.5)               | 4 (6.5)                         |              |
| Highest Level of Education – n (%)  |                         |                                 | 0.318        |
| Masters/PhD                         | 14 (17.2)               | 7 (11.3)                        |              |
| Postgraduate Cert/Diploma           | 8 (9.9)                 | 3 (4.8)                         |              |
| Bachelor's Degree                   | 18 (22.2)               | 19 (30.6)                       |              |
| Technical Cert/Diploma              | 20 (24.7)               | 9 (14.5)                        |              |
| Leaving Certificate                 | 14 (17.3)               | 16 (25.8)                       |              |
| Junior Certificate                  | 7 (8.6)                 | 7 (11.3)                        |              |
| Primary School                      | 0 (0.0%)                | 1 (1.6%)                        |              |
| Employment Status – n (%)           |                         |                                 | <b>0.005</b> |
| Working Full-time                   | 28 (33.7)               | 10 (15.9)                       |              |
| Working Part-time                   | 25 (30.1)               | 11 (17.5)                       |              |
| Unable to Work due to Illness       | 14 (16.9)               | 14 (22.2)                       |              |
| Unemployed/ Seeking Work            | 9 (10.8)                | 16 (25.4)                       |              |
| Other (Studying/Retired/Home-maker) | 7 (8.4)                 | 12 (19)                         |              |

\***Bold text represents significant p values.**

### **Internal Consistency of the HADS Scale in Online and Paper-based Samples**

The internal consistency of both online and paper-based HADS measure were similar. For the anxiety subscale, the Cronbach's alpha level was 0.84 for the online sample, and 0.89 for the paper-based sample. For the depression subscale, the alpha level was 0.87 for the online sample, and 0.88 for the paper-based sample. There were no statistically significant differences between the online and paper-based samples on Cronbach's alpha for the anxiety subscale ( $p=0.073$ ) or depression subscale ( $p=0.378$ ).

### **Prevalence of anxiety and depression**

In the online sample, 25% ( $n=20$ ) had HADS scores greater than 7 indicating elevated anxiety, and 11.3% ( $n=9$ ) had anxiety scores in the clinically significant range with scores higher than 10. In the paper-based sample, 28.1% ( $n=18$ ) had elevated anxiety scores, and 14% ( $n=9$ ) of the sample had anxiety scores in the clinically significant range. For depression, 7.5% ( $n=6$ ) of the online sample had elevated scores higher than seven and 3.8% ( $n=3$ ) of the sample scored within the clinically significant range higher than 10. In the paper-based sample, 10.9% ( $n=7$ ) had elevated depression scores and 4.7% ( $n=3$ ) had depression scores in the clinically significant range. There were no significant differences in prevalence between the online and paper-based samples who had elevated anxiety ( $p=0.71$ , 95% CI = -0.12 to 0.19) or depression ( $p=0.56$ , 95% CI = -0.07 to 0.15) scores. Likewise, there was no significant difference in prevalence between those with clinically significant anxiety ( $p=0.61$ , 95% CI = -0.0 to -0.16) or depression ( $p=0.78$ , 95% CI = -0.07 to 0.11) scores.

### **HADS scores and physical health outcome variables**

We compared the online and paper-based samples on their HADS scores and physical health outcome variables. As illustrated in Table 2, there were no significant differences between the online and paper-based samples on their HADS anxiety ( $p=0.83$ ) or depression scores ( $p=0.92$ ). Similarly, there were no significant differences between the two groups on pulmonary function ( $p=0.39$ ) or BMI values ( $p=0.60$ ).

**Table 2 Physical and mental health variables by method of data collection (N=147)**

|                                                                | <b>Online Sample<br/>(n=83)</b> | <b>Paper-based Sample<br/>(n=64)</b> | <b>P Value</b> |
|----------------------------------------------------------------|---------------------------------|--------------------------------------|----------------|
| <b>HADS Anxiety (Scale range 0-21)<br/>(Median, IQR, n)</b>    | 5.00,3.00-7.75, 80              | 5.00,2.00-8.75, 64                   | 0.83           |
| <b>HADS Depression (Scale range 0-21)<br/>(Median, IQR, n)</b> | 1.00,1.00-4.00, 80              | 1.00,1.00-4.00, 64                   | 0.92           |
| <b>Pulmonary Function (FEV1%)<br/>(Mean, SD, n)</b>            | 67.23, 25.07, 62                | 63.02, 23.90, 44                     | 0.39           |
| <b>BMI<br/>(Mean, SD, n)</b>                                   | 22.01, 2.60, 67                 | 21.74, 2.41, 38                      | 0.60           |

### **Associations between HADS scores and physical health variables**

Table 3 illustrates the associations between HADS anxiety and depression scores with the physical health variables of pulmonary function and BMI for both the online and paper-based samples. The

results of Spearman's correlational coefficient indicate that there was a significant negative correlation between HADS depression scores and pulmonary function for both the online ( $r=-0.39$ ,  $p=0.002$ ) and the paper-based ( $r=-0.36$ ,  $p=0.016$ ) samples. There were no significant associations between HADS anxiety scores and pulmonary function, or between HADS depression/anxiety scores and BMI for either the online or paper-based samples.

**Table 3 Association between HADS scores and health outcome variables by method of data collection (N=147)**

|                                               | Online Sample (n=83) |                          | Paper-based Sample (n=64) |                          |
|-----------------------------------------------|----------------------|--------------------------|---------------------------|--------------------------|
|                                               | HADS Anxiety         | HADS Dep                 | HADS Anxiety              | HADS Dep                 |
| <b>Pulmonary Function</b><br>(r, p-value*, n) | -0.23, 0.09, 59      | -0.39, <b>0.002</b> , 59 | -0.19, 0.23, 44           | -0.36, <b>0.016</b> , 44 |
| <b>BMI</b><br>(r, p-value, n)                 | -0.08, 0.54, 64      | 0.12, 0.35, 64           | -0.08, 0.65, 38           | -0.16, 0.34, 38          |

\*Bold text represents significant p values.

## DISCUSSION

In this cross-sectional study, we compared online and paper-based screening for depression and anxiety in adults with CF. Comparable results were found in both groups for prevalence rates and mean scores of depression and anxiety, with no statistical differences evident. Likewise, online and paper-based groups yielded similar results for associations between the mental health variables and physical health variables – pulmonary function (FEV1%) and BMI. In both groups, a significant negative association was found between depression and pulmonary function; the strength of this association was comparable. Neither group was found to have significant associations between anxiety and pulmonary function or between depression/anxiety and BMI.

In contrast to our finding, a previous study that used HADS in patients with tinnitus found significantly higher rates of depression in the online group.<sup>24</sup> Self-recruitment and the option to remain anonymous was offered as a possible explanation for this finding, indicating less inhibition in reporting mental health problems.<sup>24</sup> In our study, although online participants were self-recruiting, they provided their names and contact details with the knowledge that HADS scores above clinical cut-off point would involve disclosing this information to their CF physicians to ensure appropriate follow up care. Given the small samples in both groups in our study, there is a need for further research in larger samples to compare prevalence rates and scores of depression and anxiety using online versus paper-based assessment.

To the best of our knowledge, this is the first published study comparing online versus paper-based screening of depression and anxiety in the adult CF population. Previous research comparing online versus paper-based assessment of mental health has been conducted in patients recruited from primary care or psychiatric care,<sup>22</sup> patients with tinnitus,<sup>24</sup> and in psychology students.<sup>30</sup> In these studies, regardless of the measurement used to assess anxiety and/or depression, the internal consistency for online and paper-based versions were similar. Our findings concur. In both the online and paper-based groups, the internal consistency of the HADS was comparably high, and not significantly different. These findings suggest that online screening of mental health in adults with CF offers a reliable alternative to paper-based screening in clinic settings.

Our study demonstrated the potential of online mental health screening to yield higher participation rates within a shorter timeframe compared to paper-based administration during clinics (or later at home). Over a period of two weeks, 99 HADS online questionnaires were returned whereas it took twelve months to collect 64 paper-based questionnaires. There is some evidence to

1  
2  
3 suggest that paper-based screening within clinic settings is a challenge. In a feasibility study<sup>31</sup> on  
4 implementing the ICMH-CF guidance<sup>11</sup> on screening for depression and anxiety symptoms during CF  
5 clinics, concerns were expressed by staff that lengthy clinic visits and a requirement to complete  
6 'another test' were barriers to paper-based screening. Giving an option to take home the screening  
7 measure for completion was also seen as problematic because it risked non-return and the  
8 possibility of missing symptoms of depression or anxiety.<sup>31</sup> A conclusion from that study was that  
9 there is a need to consider online screening outside the clinic setting to allow for faster  
10 administration and scoring.<sup>31</sup> Given the time and resource constraints of conducting mental health  
11 screening during CF clinic visits,<sup>16,31</sup> the participation rates within associated timeframes identified in  
12 our study indicate that online screening may offer a practical alternative to paper-based screening  
13 and may contribute to increased participation rates. We acknowledge that our online response rate  
14 was low at 29%. A mitigating factor precluding us from extending the online survey beyond two  
15 weeks related to timelines for study completion set by the funding bodies. It is likely that the  
16 response rate would have been higher if more time was allowed, a finding evident in a feasibility  
17 study on web-based screening of physical symptoms in patients with CF which had a response rate  
18 of 80% over a nine-month period that included repeated reminders.<sup>32</sup>

20  
21 Our online and paper-based samples differed on a number of demographic variables but they did  
22 not differ on lung function or BMI, and for both depression was associated with lower lung function.  
23 The online sample was older, more were married, living with a spouse/partner, and in full or part  
24 time employment. It could be assumed from this finding that the online sample had busier life  
25 circumstances in which case online screening may be more convenient over paper-based screening.  
26 However, caution is needed with this assumption. Further research is required to determine the  
27 factors motivating the completion of online versus paper-based mental health screening among  
28 adult patients with CF. The acceptability of online screening among adults also needs consideration.

29  
30 Mental health screening for depression and anxiety is now set to become integral to the health  
31 assessment of patients with CF based on international guidelines.<sup>11</sup> While our study demonstrates  
32 the potential of online mental health screening as a practical, efficient and reliable approach, there  
33 are issues to be considered regarding implementation into CF services. An information technology  
34 infrastructure supporting the use of electronic health records is needed to ensure a seamless  
35 paperless system. Electronic health records could be used administer, score, track and provide  
36 results to healthcare professionals compliant with data protection legislation. Peckham and  
37 colleagues found that the implementation of electronic records incorporating a coding structure for  
38 CF care into CF centres of three hospitals led to greater efficiencies such that completion of annual  
39 assessments regarding physical health more than doubled from 43% to 92%.<sup>33</sup> Furthermore,  
40 information exchange between multidisciplinary team members improved.<sup>33</sup> A recent report on the  
41 eHealth status of European Union countries showed that almost half of the member states do not  
42 have national electronic health record systems with funding being a major barrier to their  
43 implementation.<sup>34</sup> The impact of implementing electronic records that include mental health  
44 assessment and care of adults with CF remains unknown to date.

45  
46 A further consideration for clinical practice regarding online screening relates to patient feedback  
47 and follow up care. In contrast to the immediate access that healthcare professionals have to  
48 patients during clinic visits, online screening is more removed and therefore requires a planned  
49 approach to providing feedback and follow-up care. There is evidence from an Australian study on  
50 the general population that tailored feedback following online screening may not promote the use  
51 of professional services to deal with mental health problems.<sup>35</sup> In that study, mental health  
52 screening was not embedded within an existing health service that participants were using. While it  
53 could be expected that mental health screening of adults with CF that complies with the recent  
54 international guidelines<sup>11</sup> will be embedded in CF services regardless of being online or paper-based,  
55  
56  
57  
58  
59

1  
2  
3 inadequate numbers of psychosocial professionals and staff trained in mental healthcare within CF  
4 teams is a concern.<sup>16, 31</sup>

5 The findings of our study must be interpreted with some caution in light of limitations. The  
6 setting in which questionnaires were completed may have acted as a confounding variable as paper-  
7 based questionnaires were completed in clinics as well as in the participant's home. Sample size was  
8 small in both online and paper-based groups, therefore undermining the internal and external  
9 validity of the findings. Self-selection bias exists which also threatens the internal and external  
10 validity of the findings. The comparable findings on prevalence rates of depression and anxiety  
11 between online and paper-based groups are not based on analyses that adjusted for baseline  
12 differences in demographic data e.g. age, sex, education status, and living arrangements. We did not  
13 adjust for baseline differences because of the small sample size. The cross-sectional design of the  
14 study did not allow for assessment of changes in depression and anxiety over time and what  
15 circumstances might influence these changes. Longitudinal data would help address this limitation.

16 A further limitation relates to the assessment of psychometric properties in that Cronbach's  
17 alpha only was used to test if method of administration differed for internal consistency. During the  
18 time of conducting our study, the reliability of the HADS as a clinical screening tool was critically  
19 questioned noting that although the HADS was used in TIDES, different measures were  
20 recommended from that international study.<sup>36</sup> These measures were the PHQ-9 for depression and  
21 the GAD-7 for anxiety.<sup>4,36</sup> Both these measures are recommended in the international guidelines for  
22 mental health screening of patients with CF,<sup>11</sup> which are since being used in CF clinic settings.<sup>15,31</sup>  
23 Because of the current shift away from using HADS as a screening tool for depression and anxiety in  
24 CF, and because of the small sample sizes in each group (online and paper based), we did not test  
25 measurement invariance to determine if the online version of HADS is equivalent to the paper based  
26 version. Albeit scant, there is some evidence that depression scores between online and paper  
27 administration of the PHQ-9 are not significantly different.<sup>37</sup> An online version of GAD-7 has been  
28 reported as reliable<sup>38</sup> but we found no evidence of comparisons with paper administration. Future  
29 research needs to conduct confirmatory factor analysis to assess the psychometric invariance  
30 between online and paper-based administration of these screening tools in the CF population,  
31 including the settings in which they are administered.

32 A strength of our exploratory cross-sectional analysis is that it is the first to compare online  
33 versus paper-based assessment of depression and anxiety in adults with CF. In the TIDES  
34 international study all data collection was paper-based.<sup>4</sup> Therefore, our study draws attention to the  
35 potential of online screening for depression and anxiety in adult patients with CF. The similarities in  
36 findings between both methods of administration is encouraging regarding prevalence rates of  
37 depression and anxiety, associations with pulmonary function and BMI. These findings demonstrate  
38 that online screening could be an alternative method to paper-based screening for those who:  
39 prefer this option; or miss clinic appointments, for example, due to family or work responsibilities; or  
40 wish to avoid spending extra time at clinics or annual review completing 'another test' as shown in  
41 previous research.<sup>31</sup>

## 42 43 44 45 46 47 **CONCLUSION**

48 In conclusion, some adult patients with CF experience symptoms of depression and anxiety. Both  
49 depression and anxiety can negatively impact on pulmonary function. The international  
50 recommendation for annual screening of depression and anxiety<sup>11</sup> therefore applies to patients with  
51 CF living in Ireland. This study has highlighted that online screening offers an alternative method to  
52 paper-based screening. The feasibility, acceptability, reliability and validity of online screening  
53 compared to paper-based screening needs further research.

**Acknowledgements** We are grateful to all adult patients with CF who participated in the study, and to all CF teams who supported access to clinics and data collection. We are also grateful to Cystic Fibrosis Ireland who supported administration of the online survey.

**Contributors** ES, IJP, AJD, KR, APF, MNiC contributed to design and application for funding. ES & JC prepared for ethical approval and negotiated access to CF centres in Ireland. JC & BH collected data. JC conducted data analysis supported by APF and EL. AH & AJD offered critical insights into mental health screening. All authors contributed to the interpretation of results. JC & ES drafted the manuscript. All authors have read, edited, and approved the manuscript.

**Funding** This work was supported by a research grant jointly funded by the Health Research Board, Ireland and Cystic Fibrosis Ireland (grant file reference: MRCG/2011/9).

**Competing interests** None declared.

**Ethics Approval** Clinical Research Ethics Committee, University College Cork (Ref no: ECM4(ii)04/12/12, and amended for online data collection-(Ref no: ECM4(ii)03/03/15).

**Data Sharing Statement** No additional data are available.

## REFERENCES

1. Mehta G, Macek M Jr, Mehta A. Cystic fibrosis across Europe: EuroCareCF analysis of demographic data from 35 countries. *J Cyst Fibros* 2010; 9: S5-21.
2. Orenstein D, Winni GB, Altma H. Cystic fibrosis: a 2002 update. *J Pediatr* 2002;140:156-64.
3. Ratjen F. Cystic fibrosis: Pathogenesis and future treatment strategies. *Respir Care* 2009; 54:595-605.
4. Quittner A, Goldbeck L, Abbott J, et al. Prevalence of depression and anxiety in patients with cystic fibrosis and parent caregivers: results of The International Depression Epidemiological Study across nine countries. *Thorax* 2014; 69:1090-7.
5. Duff A, Abbott J, Cowperthwaite C, et al. Depression and anxiety in adolescents and adults with cystic fibrosis in the UK: A cross-sectional study. *J Cyst Fibros* 2014;13(6):745-53.
6. Modi A, Driscoll KA, Montag-Leifling K, et al. Screening for symptoms of depression and anxiety in adolescents and young adults with cystic fibrosis. *Pediatr Pulmonol* 2011; 46:153-59.
7. Goldbeck L, Besier T, Hinz A, et al. Prevalence of symptoms of anxiety and depression with cystic fibrosis. *CHEST* 2010;138:929-36.
8. Besier T, Goldbeck L. Anxiety and depression in adolescents with CF and their caregivers. *J Cyst Fibros* 2011;10:435-42.
9. Oliveira C, Sole A, Girón RM, et al. Depression and anxiety symptoms in Spanish adult patients with cystic fibrosis: associations with health-related quality of life. *Gen Hosp Psychiatry* 2016;40:39-46.
10. Smyth A, Bell SC, Bojcin S, et al. European Cystic Fibrosis Society standards of care: Best practice guidelines. *J Cyst Fibros* 2014;13(1):S23-42.
11. Quittner A, Abbott J, Georgiopoulos, AM, et al. International Committee on Mental Health in Cystic Fibrosis: Cystic Fibrosis Foundation and European Cystic Fibrosis Society consensus statements for screening and treating depression and anxiety. *Thorax* 2016; 71: 26-34.
12. Yohannes A, Willgoss TM, Fatoye FA, et al. Relationship between anxiety, depression, and quality of life in adult patients with cystic fibrosis. *Respir Care* 2012;57(4):550-56.
13. Havermans T, Colpaert K, Dupont LJ. Quality of life in patients with cystic fibrosis: Association with anxiety and depression. *J Cyst Fibros* 2008;7:581-84.
14. Riekert K, Bartlett SJ, Boyle MP, et al. The association between depression, lung function, and health-related quality of life among adults with cystic fibrosis. *CHEST* 2007;132:231-237.

15. Quon B, Bentham WD, Unutzer J, et al. Prevalence of symptoms of depression and anxiety in adults with cystic fibrosis based on the PHQ-9 and GAD-7 screening questionnaires. *Psychosomatics* 2015;56:345-53
16. Abbott J, Elborn JS, Georgiopoulos AM, et al. Cystic Fibrosis Foundation and European Cystic Fibrosis Society Survey of cystic fibrosis mental health care delivery. *J Cyst Fibros* 2015;14:533-39.
17. Ogles B, France C, Lunnen K, et al. Computerized depression screening and awareness. *Community Ment Health Journal* 1998;34(1):27-38.
18. Houston T, Cooper *et al.* Screening the public for depression through the internet. *Psychiatr Services* 2001;52(3):362-67.
19. Carlson L, Groff S, Maciejewski O, et al. Screening for distress in lung and breast cancer outpatients: a randomized controlled trial. *J Clin Oncol* 2010;20(28):33-43.
20. Drake E, Howard E, Kinsey E. Online screening and referral for postpartum depression: an exploratory study. *Community Ment Health J* 2014;50(3):305-11.
21. Gill S, Contreras O, Munoz R, et al. Participant retention in an automated online monthly depression rescreening program: patterns and predictors. *Internet Interv* 2014;1(1):20-25.
22. Holländare F, Andersson G, Engström I. A comparison of psychometric properties between internet and paper versions of two depression instruments (BDI-II and MADRS-S) administered to clinic patients. *J Med Internet Res* 2010;12(5):E49.
23. Trustram Eve C, de Jag CA. Piloting and validation of a self-administered online cognitive screening tool in normal older persons: The cognitive function test. *Int J of Geriatr Psychiatr* 2014;29:198-206.
24. Andersson G, Kaldo-Sandstrom V, Stroma L, et al. Internet administration of the Hospital Anxiety and Depression Scale in a sample of tinnitus patients. *J Psychosom Res.* 2003;55:259-62.
25. Cystic Fibrosis Registry of Ireland *Cystic Fibrosis Registry of Ireland 2012 Annual Report*. Dublin: Cystic Fibrosis Registry of Ireland, 2012.
26. Savage E, McCarron, S. Research access to adolescents and young adults. *Appl Nurs Res* 2009;22:63-7.
27. Landers M, McCarthy G, Savage E. Challenges in recruiting participants in a multi-centre study on symptom experiences and self care strategies of bowel symptoms following colorectal surgery. *J Res Nurs* 2012;17(5):497-506.
28. Zigmond A, Snaith R. The Hospital Anxiety and Depression Scale. *Acta Psychiatrica Scandinavica* 1983;67: 361-70.
29. Bjelland I, Dahl A, Haug T, et al. The validity of the Hospital Anxiety and Depression Scale: an updated literature review. *J Psychosom Res* 2002; 52: 69-77.
30. Vallejo MA, Jordan CM, Diaz MI, et al. Psychological assessment via the internet: a reliability and validity study of online (vs paper-and-pencil) versions of the General Health Questionnaire-28 (GHQ-28) and the Symptoms Check-List-90-Revised (SCL-90-R). *J Med Internet Res* 2007; 9: 1-10.
31. Duff AJ, Bowmer G, Waldron R, et al. Implementing ICMH-CF (International Committee on Mental Health in CF) guidance on screening for depression and anxiety symptoms: A feasibility and pilot study. *J Cyst Fibros* 2016; 15: 33-4.
32. Balzano J, Fresenius A, Walker P, et al. Web-based symptom screening in cystic fibrosis patients: A feasibility study. *J Cyst Fibros* 2016; 15: 102-8.
33. Peckham, D, Etherington C, White H, et al. The development and deployment of integrated electronic care records in a regional adult and paediatric cystic fibrosis unit. *J Cyst Fibros* 2014; 13: 681-6.
34. World Health Organization. From innovation to implementation: eHealth in the WHO European Region. 2016; [http://www.euro.who.int/\\_\\_data/assets/pdf\\_file/0012/302331](http://www.euro.who.int/__data/assets/pdf_file/0012/302331) (accessed 9 August 2017)

- 1  
2  
3 35. Batterham PJ, Calear AL, Sunderland M, et al. Online screening and feedback to increase  
4 help-seeking for mental health problems: population-based randomised controlled trial. *Br J*  
5 *Psychol* 2016; 2: 67-73.
- 6 36. Webb AK, Bryon M. The International Depression Epidemiological Study (TIDES): unfinished  
7 business? *Thorax* 2014; 69: 1067-8.
- 8 37. Bot AG, Menendez ME, Neuhaus V. et al. The comparison of paper- and web-based  
9 questionnaires in patients with hand and upper extremity illness. *Hand* 2013; 8: 2010-4.
- 10 38. Donker T, van Straten A, Marks I, et al. Quick and easy self-rating of Generalized Anxiety  
11 Disorder: validity of the Dutch web-based GAD-7, GAD-2 and GAD-SI. *Psychiatr Res* 2011;  
12 188: 58-64.
- 13  
14  
15  
16  
17  
18  
19  
20  
21  
22  
23  
24  
25  
26  
27  
28  
29  
30  
31  
32  
33  
34  
35  
36  
37  
38  
39  
40  
41  
42  
43  
44  
45  
46  
47  
48  
49  
50  
51  
52  
53  
54  
55  
56  
57  
58  
59  
60



**STROBE 2007 (v4) checklist of items to be included in reports of observational studies in epidemiology\***  
**Checklist for cohort, case-control, and cross-sectional studies (combined)**

| Section/Topic        | Item # | Recommendation                                                                                                                                                                                                                                                                                                                                                                                                                                                         | Reported on page #                                                                                                                                                                                                                                                                                         |
|----------------------|--------|------------------------------------------------------------------------------------------------------------------------------------------------------------------------------------------------------------------------------------------------------------------------------------------------------------------------------------------------------------------------------------------------------------------------------------------------------------------------|------------------------------------------------------------------------------------------------------------------------------------------------------------------------------------------------------------------------------------------------------------------------------------------------------------|
| Title and abstract   | 1      | (a) Indicate the study's design with a commonly used term in the title or the abstract                                                                                                                                                                                                                                                                                                                                                                                 | Title page & Abstract (pg.2)                                                                                                                                                                                                                                                                               |
|                      |        | (b) Provide in the abstract an informative and balanced summary of what was done and what was found                                                                                                                                                                                                                                                                                                                                                                    | Pg.2 within Abstract.                                                                                                                                                                                                                                                                                      |
| <b>Introduction</b>  |        |                                                                                                                                                                                                                                                                                                                                                                                                                                                                        |                                                                                                                                                                                                                                                                                                            |
| Background/rationale | 2      | Explain the scientific background and rationale for the investigation being reported                                                                                                                                                                                                                                                                                                                                                                                   | Pg 3                                                                                                                                                                                                                                                                                                       |
| Objectives           | 3      | State specific objectives, including any pre-specified hypotheses                                                                                                                                                                                                                                                                                                                                                                                                      | Pg 4 – last paragraph of Introduction.                                                                                                                                                                                                                                                                     |
| <b>Methods</b>       |        |                                                                                                                                                                                                                                                                                                                                                                                                                                                                        |                                                                                                                                                                                                                                                                                                            |
| Study design         | 4      | Present key elements of study design early in the paper                                                                                                                                                                                                                                                                                                                                                                                                                | Pg 4 – first section of Methods.                                                                                                                                                                                                                                                                           |
| Setting              | 5      | Describe the setting, locations, and relevant dates, including periods of recruitment, exposure, follow-up, and data collection                                                                                                                                                                                                                                                                                                                                        | Pg 4-Setting/ locations-First section of Methods;<br>Pg 4- Dates & period of recruitment-line 49;<br>Pg 4 Exposure –reference to depression & anxiety –line 15;<br>Pg4 Data Collection Procedures section (last paragraph) & pg 5 (first paragraph)- Data collection procedure for paper-based and online. |
| Participants         | 6      | (a) <i>Cohort study</i> —Give the eligibility criteria, and the sources and methods of selection of participants. Describe methods of follow-up<br><i>Case-control study</i> —Give the eligibility criteria, and the sources and methods of case ascertainment and control selection. Give the rationale for the choice of cases and controls<br><i>Cross-sectional study</i> —Give the eligibility criteria, and the sources and methods of selection of participants | (c) Pg 4 in Section on Participants & Recruitment.                                                                                                                                                                                                                                                         |
|                      |        | (b) <i>Cohort study</i> —For matched studies, give matching criteria and number of exposed and unexposed<br><i>Case-control study</i> —For matched studies, give matching criteria and the number of controls per case                                                                                                                                                                                                                                                 |                                                                                                                                                                                                                                                                                                            |
| Variables            | 7      | Clearly define all outcomes, exposures, predictors, potential confounders, and effect modifiers. Give diagnostic criteria, if applicable                                                                                                                                                                                                                                                                                                                               | Pg 5. Sociodemographic variables and physical health variables described in section on Measures – paragraph 1.                                                                                                                                                                                             |

|                           |     |                                                                                                                                                                                                                                                                                   |                                                                                                          |
|---------------------------|-----|-----------------------------------------------------------------------------------------------------------------------------------------------------------------------------------------------------------------------------------------------------------------------------------|----------------------------------------------------------------------------------------------------------|
|                           |     |                                                                                                                                                                                                                                                                                   | Pg 5: Variables of depression and anxiety addressed in section on Measures -2 <sup>nd</sup> paragraph.   |
| Data sources/ measurement | 8*  | For each variable of interest, give sources of data and details of methods of assessment (measurement). Describe comparability of assessment methods if there is more than one group                                                                                              | Pg. 5 – Measures Section.                                                                                |
| Bias                      | 9   | Describe any efforts to address potential sources of bias                                                                                                                                                                                                                         | Pg.4 Participants and Recruitment (efforts to recruit from all 6 CF Centres for population based sample. |
| Study size                | 10  | Explain how the study size was arrived at                                                                                                                                                                                                                                         | Pg. 4. Participants and recruitment                                                                      |
| Quantitative variables    | 11  | Explain how quantitative variables were handled in the analyses. If applicable, describe which groupings were chosen and why                                                                                                                                                      | Pg. 5. Statistical analysis section                                                                      |
| Statistical methods       | 12  | (a) Describe all statistical methods, including those used to control for confounding                                                                                                                                                                                             | Pg 5. Statistical analysis section                                                                       |
|                           |     | (b) Describe any methods used to examine subgroups and interactions                                                                                                                                                                                                               | Pg. 5. Statistical analysis section                                                                      |
|                           |     | (c) Explain how missing data were addressed                                                                                                                                                                                                                                       | Pg. 6. First paragraph on page. Statistical analysis section                                             |
|                           |     | (d) Cohort study—If applicable, explain how loss to follow-up was addressed<br>Case-control study—If applicable, explain how matching of cases and controls was addressed<br>Cross-sectional study—If applicable, describe analytical methods taking account of sampling strategy | Pg. 5. Statistical analysis section. Details of how online and paper based samples were compared         |
|                           |     | (e) Describe any sensitivity analyses                                                                                                                                                                                                                                             | NA                                                                                                       |
| <b>Results</b>            |     |                                                                                                                                                                                                                                                                                   |                                                                                                          |
| Participants              | 13* | (a) Report numbers of individuals at each stage of study—eg numbers potentially eligible, examined for eligibility, confirmed eligible, included in the study, completing follow-up, and analysed                                                                                 | Pg. 6. Results section on demographic characteristics                                                    |
|                           |     | (b) Give reasons for non-participation at each stage                                                                                                                                                                                                                              | In Data Collection Procedures –Pg. 5- Line 3& 4, and line 10&11                                          |
|                           |     | (c) Consider use of a flow diagram                                                                                                                                                                                                                                                | NA                                                                                                       |
| Descriptive data          | 14* | (a) Give characteristics of study participants (eg demographic, clinical, social) and information on exposures and potential confounders                                                                                                                                          | Pg. 6. Results section on demographic characteristics                                                    |
|                           |     | (b) Indicate number of participants with missing data for each variable of interest                                                                                                                                                                                               | Pgs. 6-8. Tables in results section indicate number of participants for each variable (n)                |
|                           |     | (c) Cohort study—Summarise follow-up time (eg, average and total amount)                                                                                                                                                                                                          | NA                                                                                                       |
| Outcome data              | 15* | Cohort study—Report numbers of outcome events or summary measures over time                                                                                                                                                                                                       | NA                                                                                                       |
|                           |     | Case-control study—Report numbers in each exposure category, or summary                                                                                                                                                                                                           | NA                                                                                                       |

|                          |    |                                                                                                                                                                                                              |                                                                                  |
|--------------------------|----|--------------------------------------------------------------------------------------------------------------------------------------------------------------------------------------------------------------|----------------------------------------------------------------------------------|
|                          |    | measures of exposure                                                                                                                                                                                         |                                                                                  |
|                          |    | <i>Cross-sectional study</i> —Report numbers of outcome events or summary measures                                                                                                                           | Pg. 7 Sections on prevalence, HADS scores and physical health outcome variables  |
| Main results             | 16 | (a) Give unadjusted estimates and, if applicable, confounder-adjusted estimates and their precision (eg, 95% confidence interval). Make clear which confounders were adjusted for and why they were included | Pg. 7. Section on prevalence of anxiety and depression                           |
|                          |    | (b) Report category boundaries when continuous variables were categorized                                                                                                                                    | Pg. 7 Section on prevalence of anxiety and depression                            |
|                          |    | (c) If relevant, consider translating estimates of relative risk into absolute risk for a meaningful time period                                                                                             | NA                                                                               |
| Other analyses           | 17 | Report other analyses done—eg analyses of subgroups and interactions, and sensitivity analyses                                                                                                               | Pg. 8. Section on associations between HADS scores and physical health variables |
| <b>Discussion</b>        |    |                                                                                                                                                                                                              |                                                                                  |
| Key results              | 18 | Summarise key results with reference to study objectives                                                                                                                                                     | Pg.8 paragraph 1.                                                                |
| Limitations              | 19 | Discuss limitations of the study, taking into account sources of potential bias or imprecision. Discuss both direction and magnitude of any potential bias                                                   | Pg 10. Paragraph 2(from line 11)                                                 |
| Interpretation           | 20 | Give a cautious overall interpretation of results considering objectives, limitations, multiplicity of analyses, results from similar studies, and other relevant evidence                                   | Pg 10 & 11 within discussion.                                                    |
| Generalisability         | 21 | Discuss the generalisability (external validity) of the study results                                                                                                                                        | Pg. 10 paragraph 2.                                                              |
| <b>Other information</b> |    |                                                                                                                                                                                                              |                                                                                  |
| Funding                  | 22 | Give the source of funding and the role of the funders for the present study and, if applicable, for the original study on which the present article is based                                                | Pg. 11 Line 9.                                                                   |

\*Give information separately for cases and controls in case-control studies and, if applicable, for exposed and unexposed groups in cohort and cross-sectional studies.

**Note:** An Explanation and Elaboration article discusses each checklist item and gives methodological background and published examples of transparent reporting. The STROBE checklist is best used in conjunction with this article (freely available on the Web sites of PLoS Medicine at <http://www.plosmedicine.org/>, Annals of Internal Medicine at <http://www.annals.org/>, and Epidemiology at <http://www.epidem.com/>). Information on the STROBE Initiative is available at [www.strobe-statement.org](http://www.strobe-statement.org).
